# Supplementary material for: Synthesis, Larvicidal Activities and Antifungal Activities of Novel Chlorantraniliprole Derivatives and Their Target in the Ryanodine Receptor
Source: MDPI journal article supplement (doi:10.3390/molecules20033854), 2015-03-02
Supplement: s1 [file s1]

## 1. H-NMR

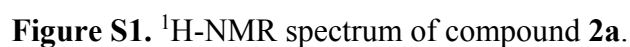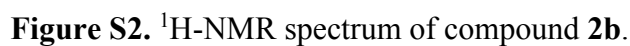

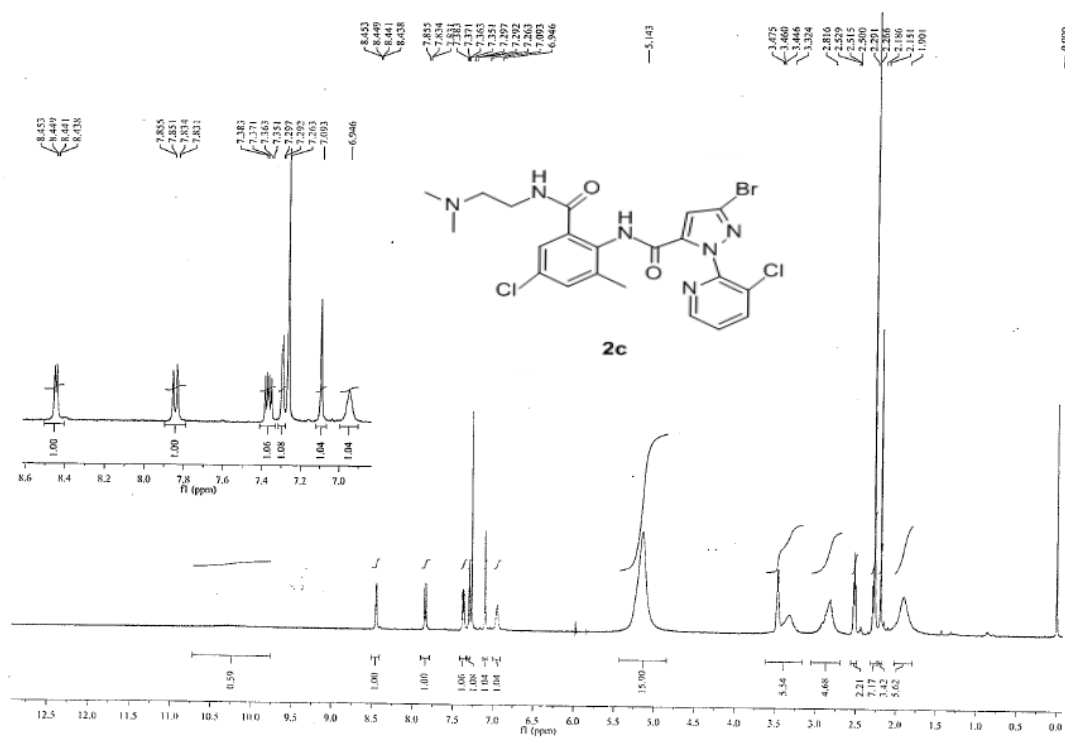

**Figure S3.**  $^1\text{H}$ -NMR spectrum of compound **2c**.

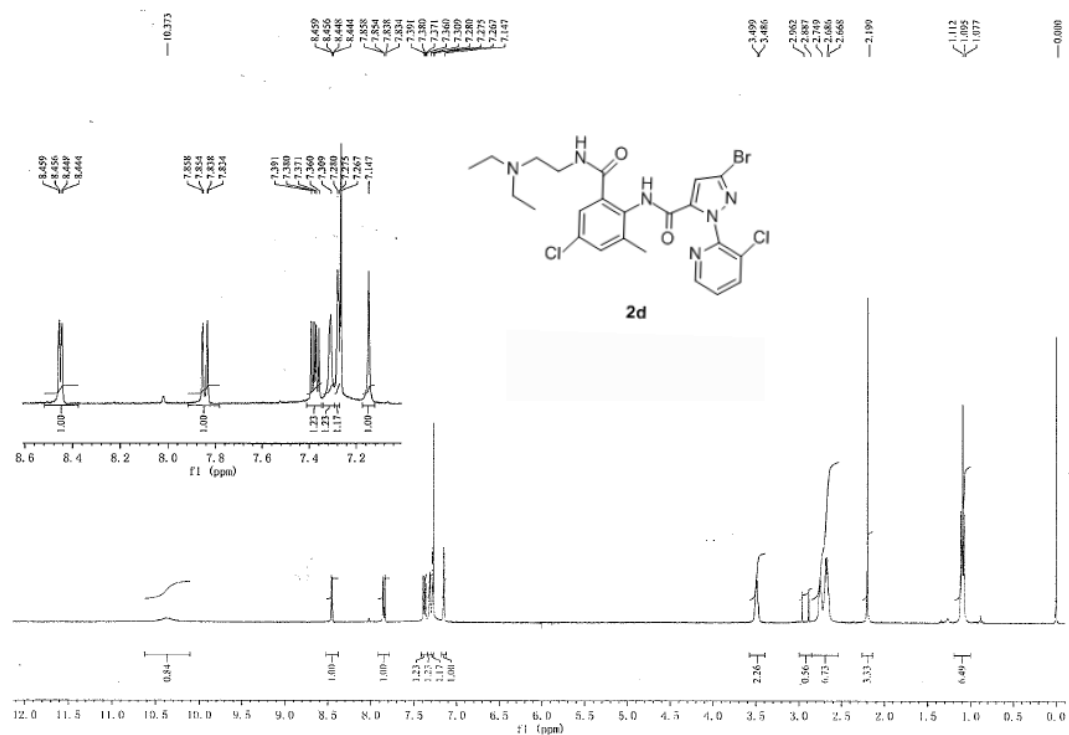

**Figure S4.**  $^1\text{H}$ -NMR spectrum of compound **2d**.

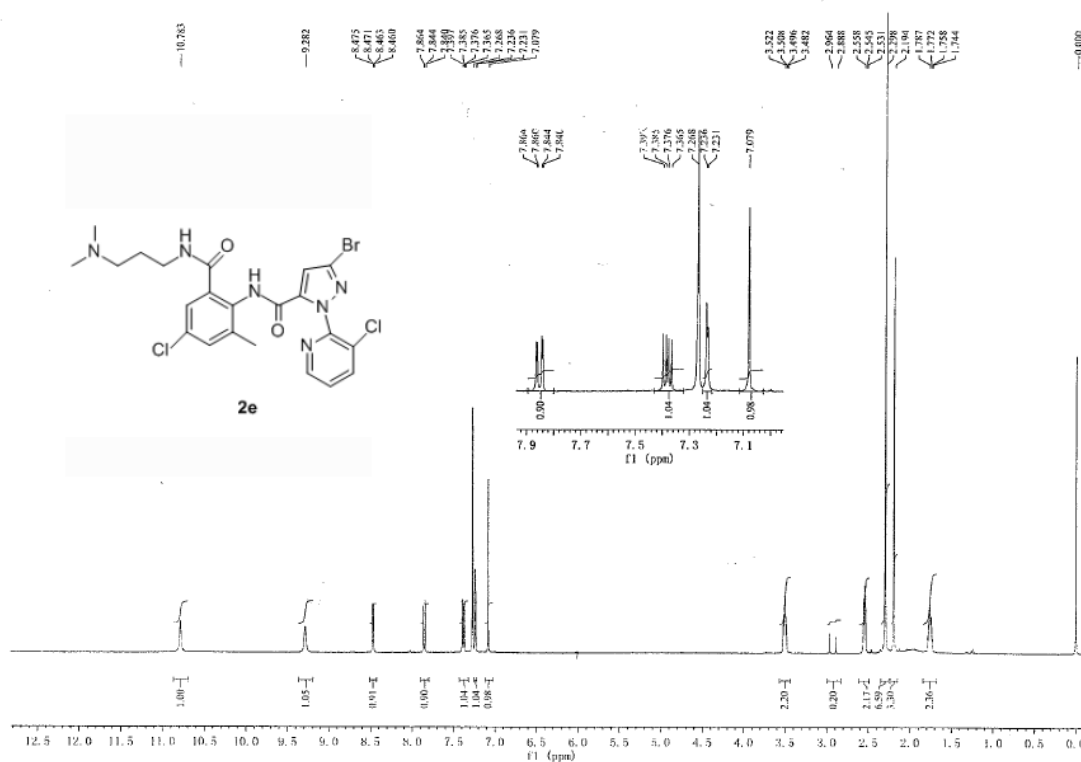

Figure S5.  $^1\text{H}$ -NMR spectrum of compound **2e**.

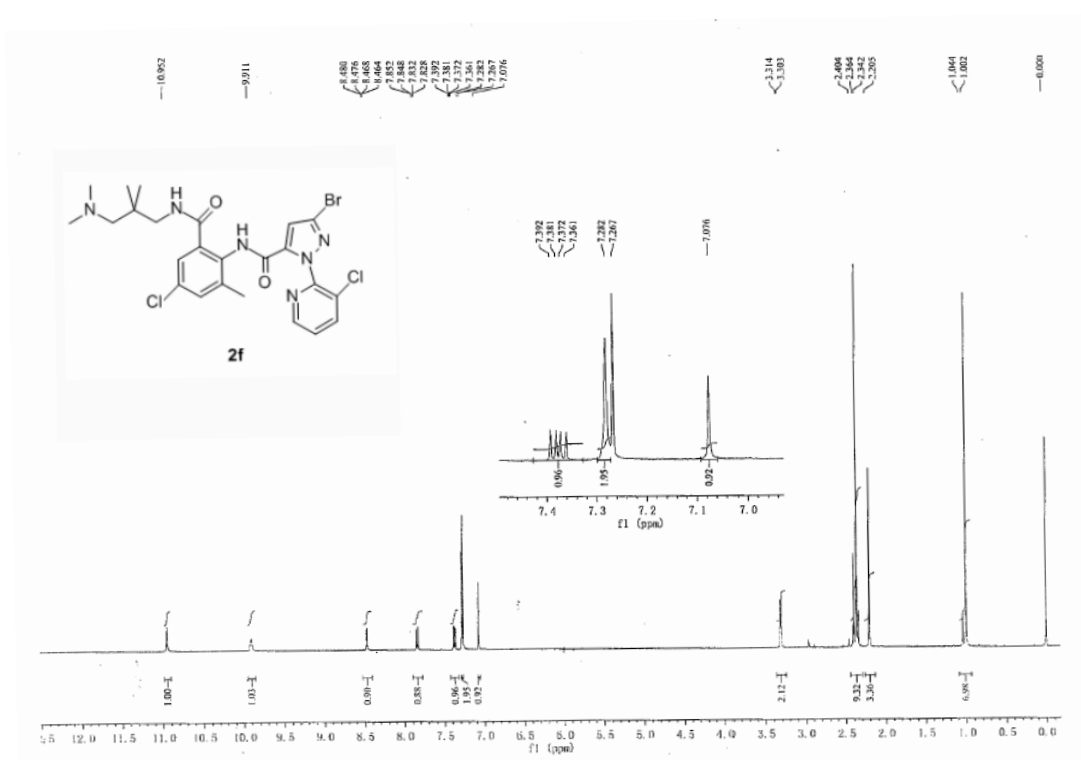

**Chemical structure of 2h:** CCN(CC)CCNC(=O)c1cc(Cl)c(C(=O)Nc2nc3ccccc3n2)c(C(=O)Nc4nc5ccccc5n4)c1

**<sup>1</sup>H NMR spectrum (CDCl<sub>3</sub>):**

- Chemical shift (ppm):** 8.461, 8.457, 8.449, 8.445, 7.857, 7.841, 7.837, 7.831, 7.397, 7.385, 7.377, 7.369, 7.365, 7.285, 7.270, 7.265, 7.211, 7.136, 4.817, 3.394, 3.379, 3.365, 2.485, 2.480, 2.465, 2.452, 2.437, 2.422, 2.407, 2.392, 2.377, 2.356, 2.341, 2.326, 2.311, 2.296, 2.281, 2.266, 2.251, 2.236, 2.221, 2.206, 2.191, 2.176, 2.161, 2.146, 2.131, 2.116, 2.101, 2.086, 2.071, 2.056, 2.041, 2.026, 2.011, 2.000.
- Integration values:** 1.00, 0.96, 1.95, 0.96, 0.94, 0.21, 2.18, 4.30, 2.29, 3.36, 0.40, 4.46, 6.50.

**Inset spectrum (7.1-7.9 ppm):**

- Chemical shift (ppm):** 7.881, 7.867, 7.857, 7.397, 7.385, 7.377, 7.369, 7.365, 7.285, 7.270, 7.265, 7.211, 7.136.
- Integration values:** 0.96, 1.95, 0.96, 0.94, 0.21.

**Figure S8.**  $^1\text{H}$ -NMR spectrum of compound **2h**.

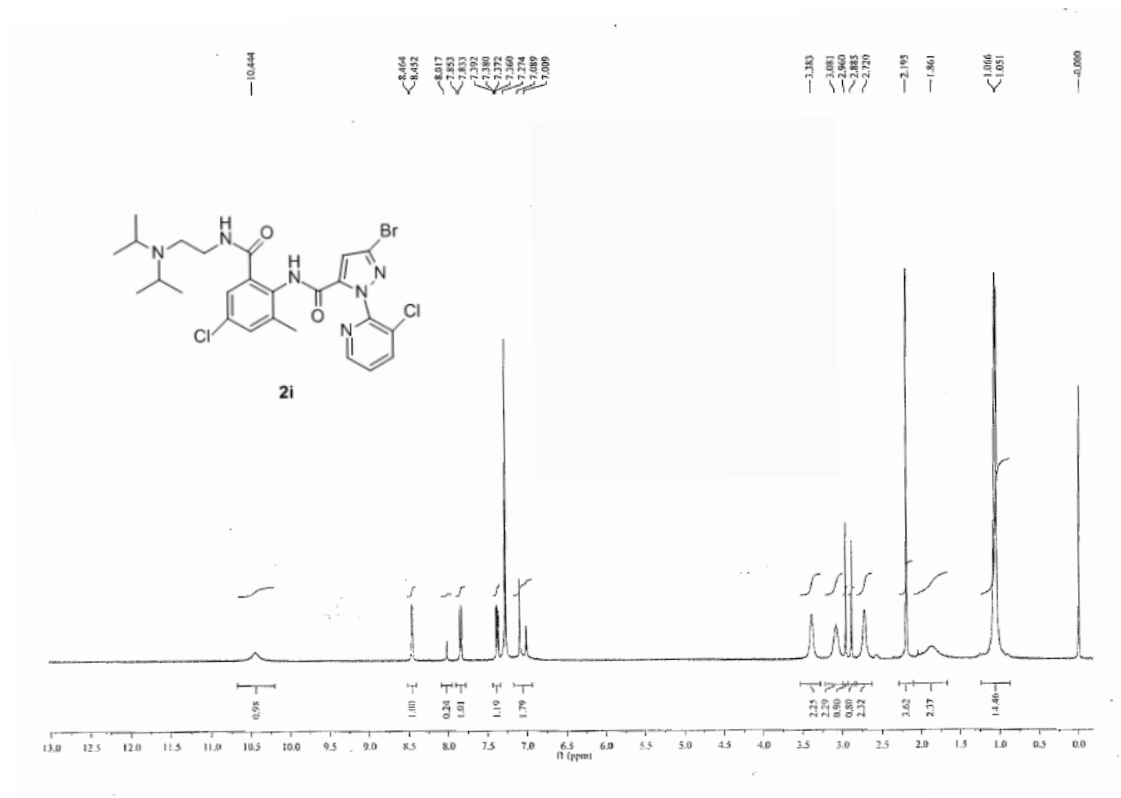

Figure S9. <sup>1</sup>H-NMR spectrum of compound 2i.

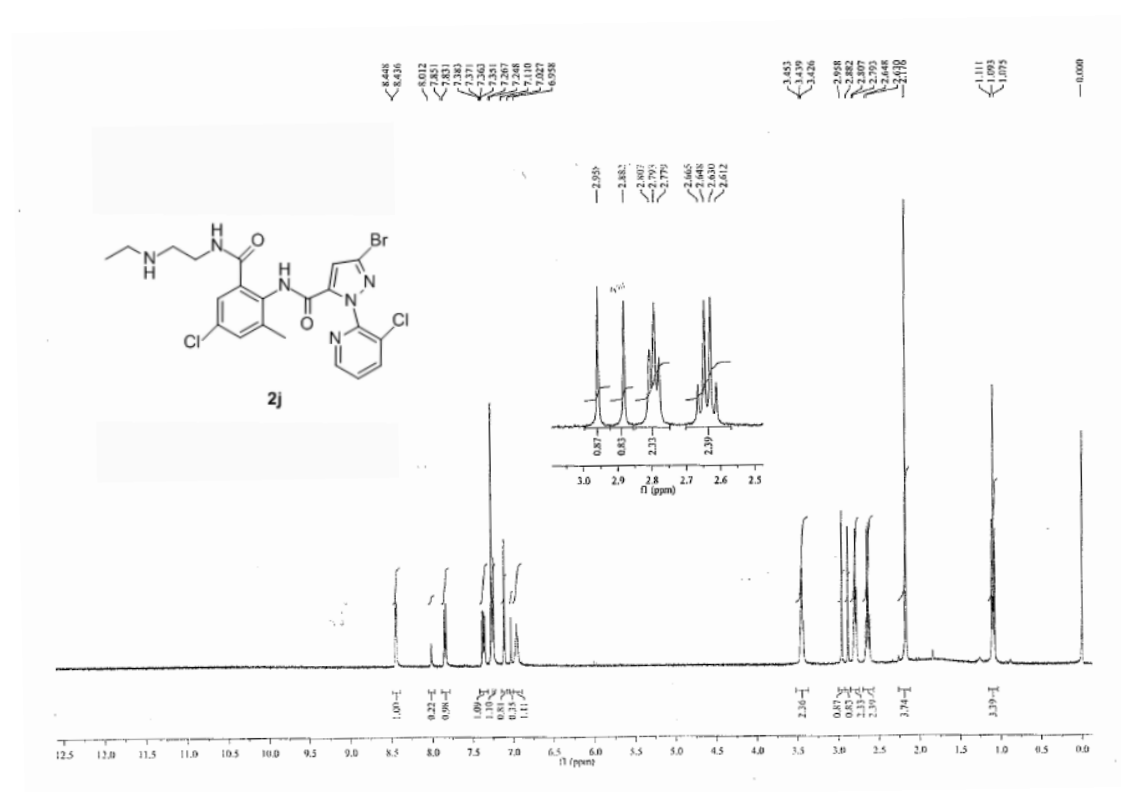

Figure S10. <sup>1</sup>H-NMR spectrum of compound 2j.

Chemical structure of compound **21** is shown as an inset. The structure is a 4-chloro-2-(2-isopropylaminoethyl)benzamide derivative with a 4-bromo-2-chloro-1H-benzotriazin-3-yl group attached via an amide linkage.

<sup>1</sup>H NMR spectrum (CDCl<sub>3</sub>) of compound **21** is shown. The spectrum displays peaks in the aromatic region (7.3–8.2 ppm) and aliphatic region (1.2–3.6 ppm). The chemical shifts (ppm) are listed above the peaks, and the integration values are shown below the peaks.

Chemical shifts (ppm): 8.081, 8.082, 8.048, 8.044, 8.044, 8.024, 7.575, 7.568, 7.544, 7.536, 7.538, 7.538, 7.439, 7.433, 7.372, 7.363, 3.562, 3.558, 3.554, 3.540, 3.527, 3.504, 3.384, 3.364, 3.036, 3.036, 3.008, 2.556, 2.552, 2.547, 2.223, 1.314, 1.297, 1.234, 1.218, 0.000.

Integration values: 1.00, 2.24, 1.84, 2.38, 3.41, 1.64, 0.97, 13.60, 5.07, 5.29, 10.40, 6.95.

**Figure S12.**  $^1\text{H}$ -NMR spectrum of compound **2l**.

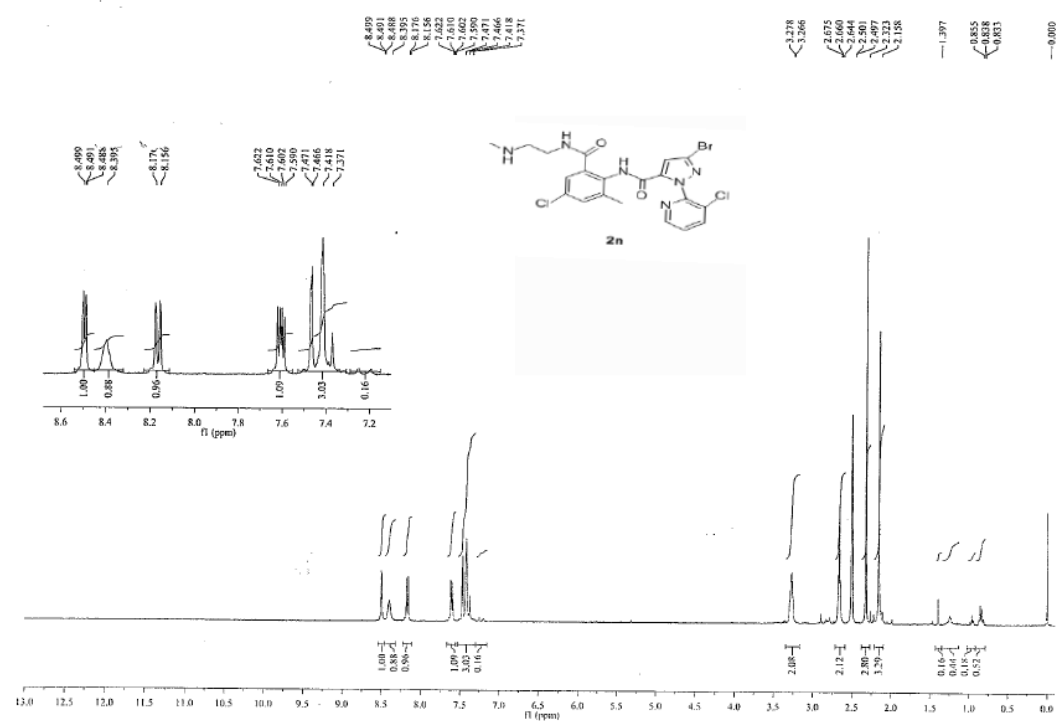

Chemical structure of **2p** is shown in the center of the figure.

<sup>1</sup>H NMR spectrum (CDCl<sub>3</sub>) of compound **2p** is displayed below the structure. The spectrum shows peaks in the aromatic region (7.0–8.5 ppm), a singlet at ~3.5 ppm, a multiplet at ~2.5 ppm, and a triplet at ~1.0 ppm. Integration values are provided below the baseline.

Key peak data (ppm, integration):

- ~10.0 (broad, 0.04)
- ~8.4 (1.00)
- ~7.8 (1.01)
- ~7.6 (2.18)
- ~7.4 (1.10)
- ~7.2 (0.91)
- ~7.1 (0.14)
- ~3.5 (2.31)
- ~2.5 (5.04)
- ~2.3 (2.31)
- ~2.1 (5.04)
- ~1.9 (3.54)
- ~1.5 (2.97)
- ~1.0 (7.19)

Inset 1 (7.3–7.7 ppm):

- 7.566
- 7.593
- 7.382
- 7.394
- 7.402
- 7.414

Inset 2 (2.5–2.8 ppm):

- 2.565
- 2.583
- 2.601
- 2.619
- 2.665
- 2.679
- 2.692



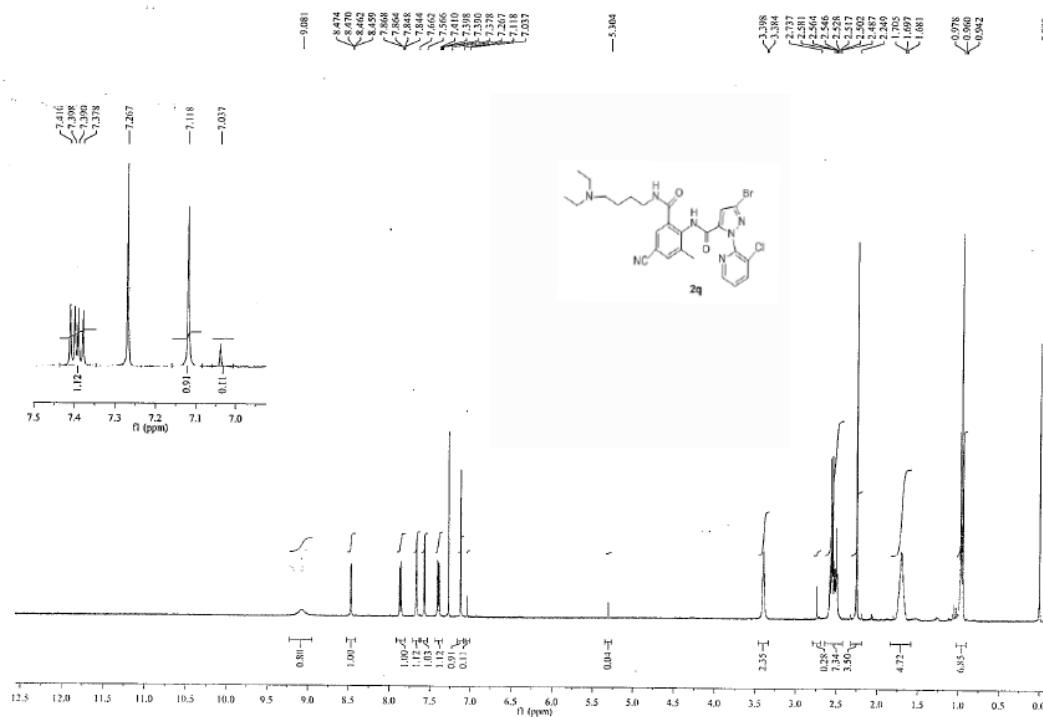

Figure S17.  $^1\text{H}$ -NMR spectrum of compound **2q**.

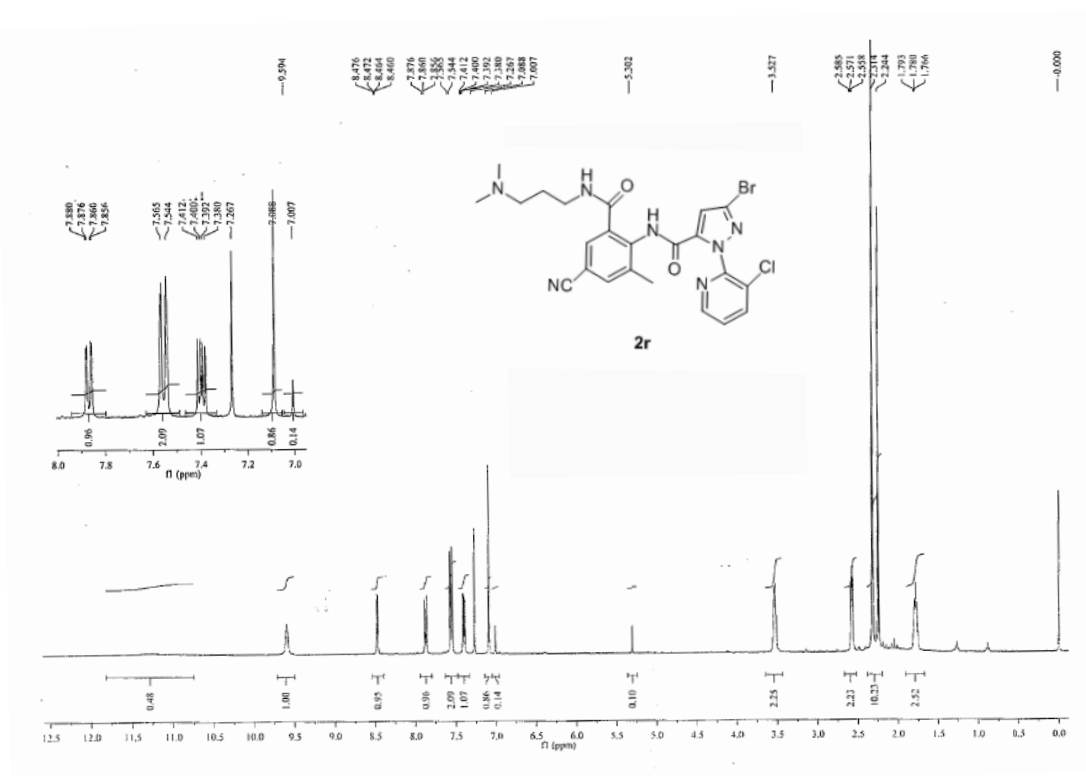

Figure S18.  $^1\text{H}$ -NMR spectrum of compound **2r**.

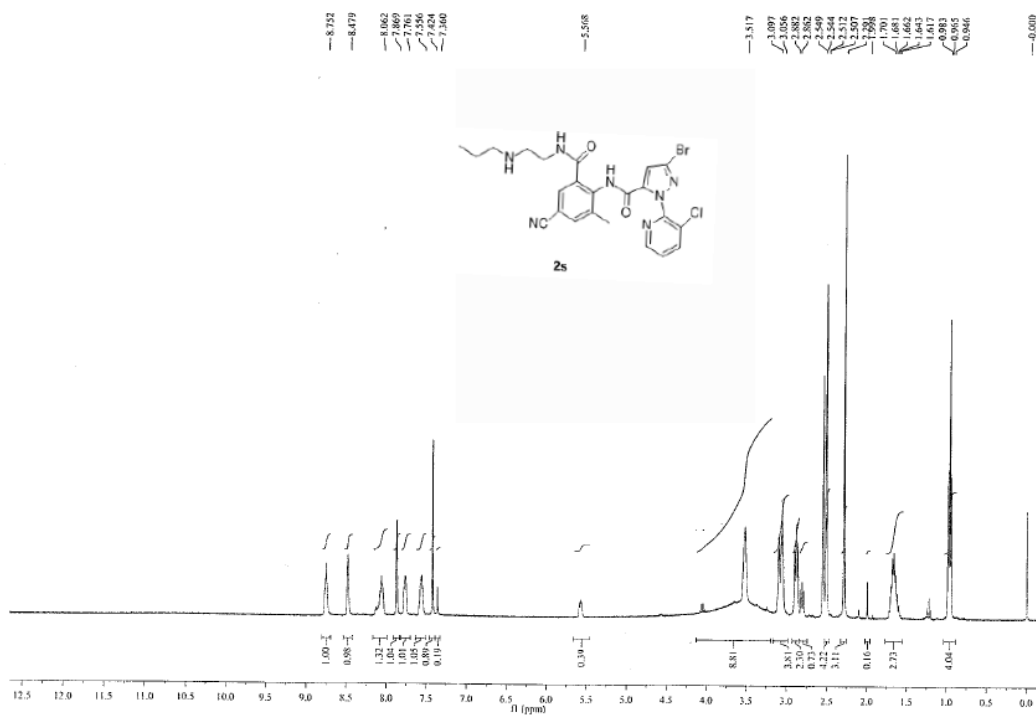

Figure S19.  $^1\text{H}$ -NMR spectrum of compound **2s**.

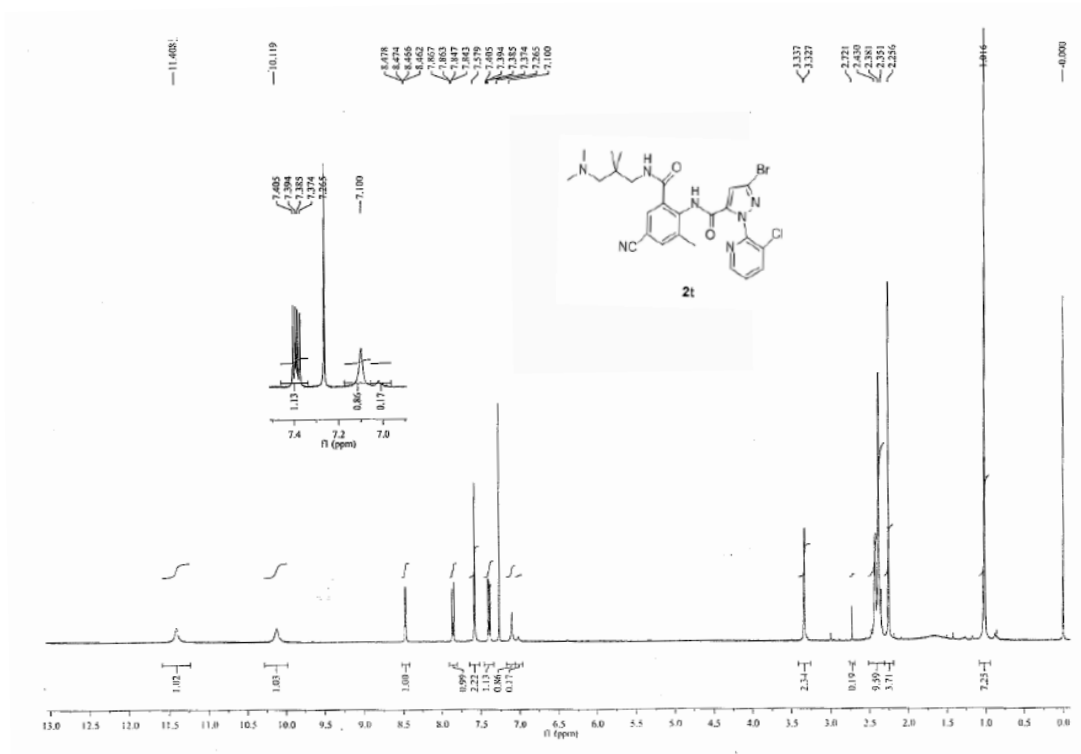

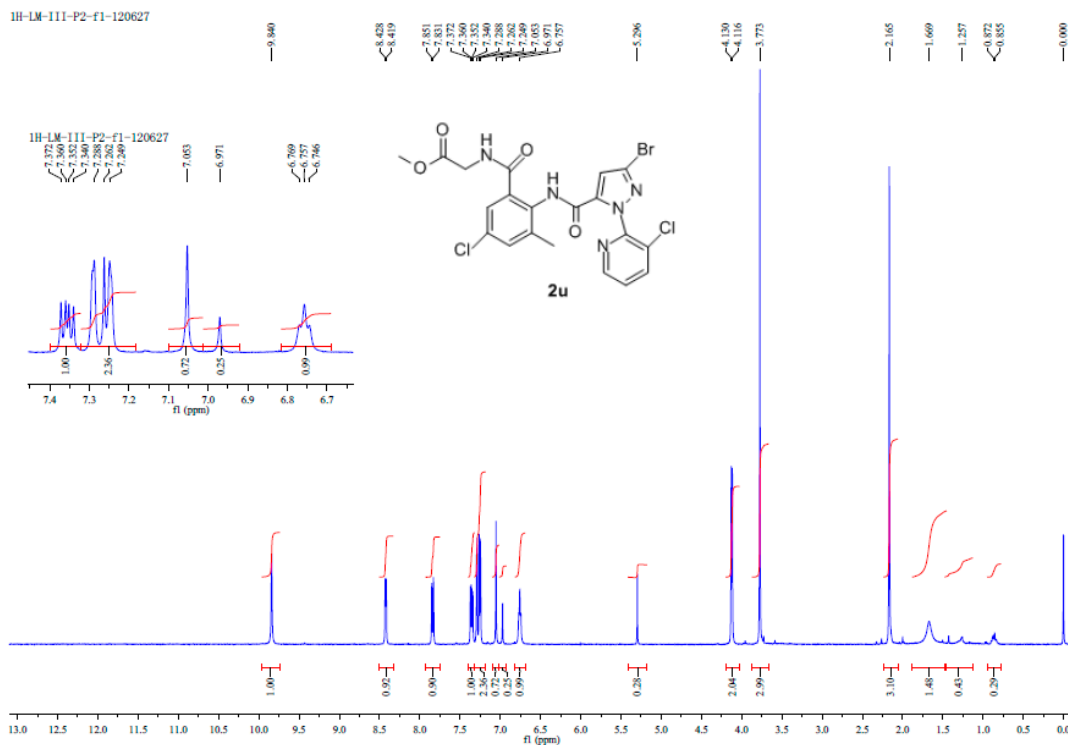

**Figure S21.**  $^1\text{H}$ -NMR spectrum of compound **2u**.

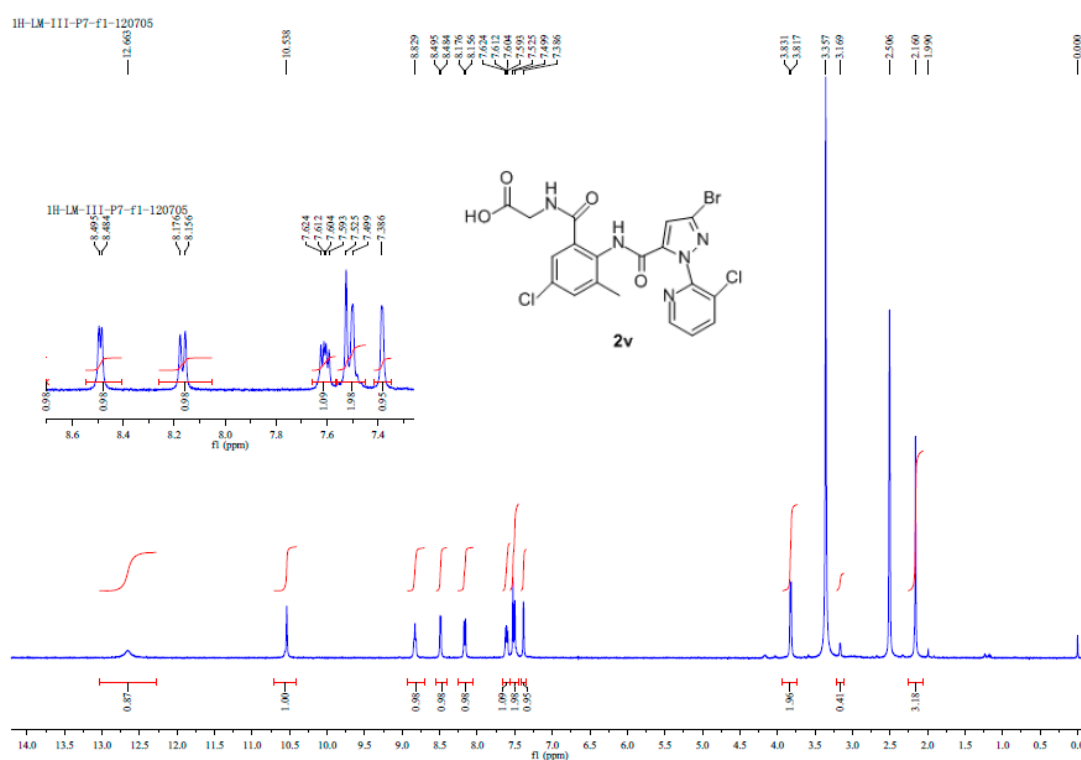

**Figure S22.**  $^1\text{H}$ -NMR spectrum of compound **2v**.

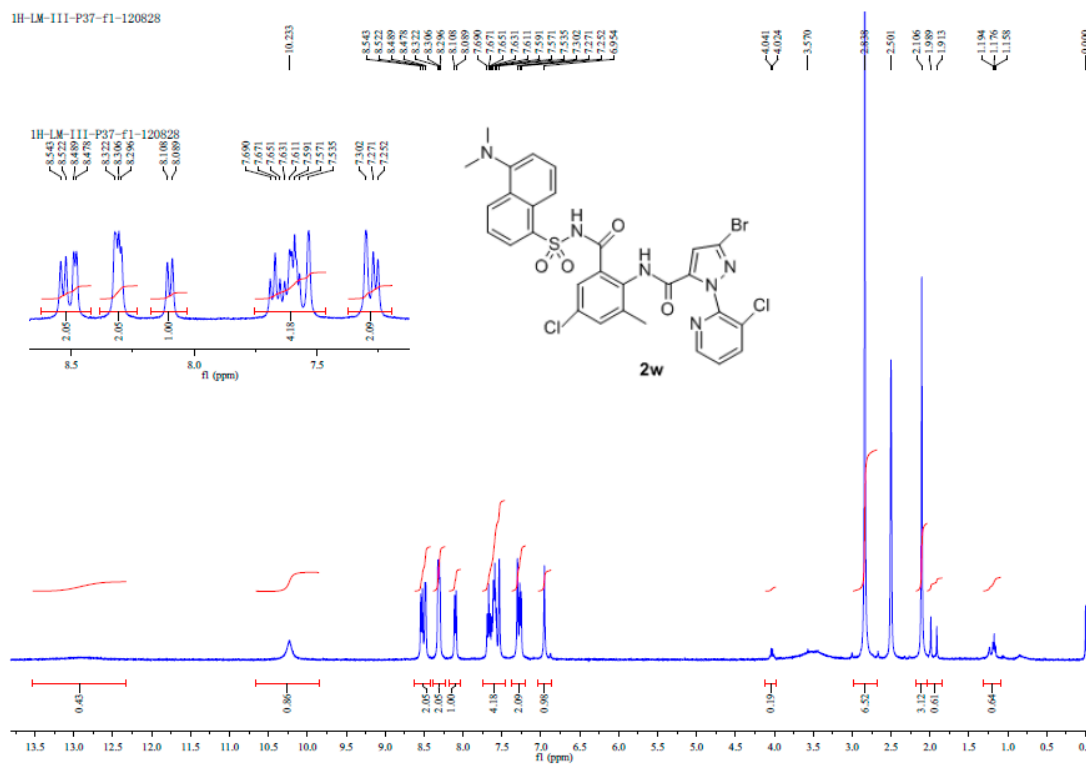Figure S23. <sup>1</sup>H-NMR spectrum of compound **2w**.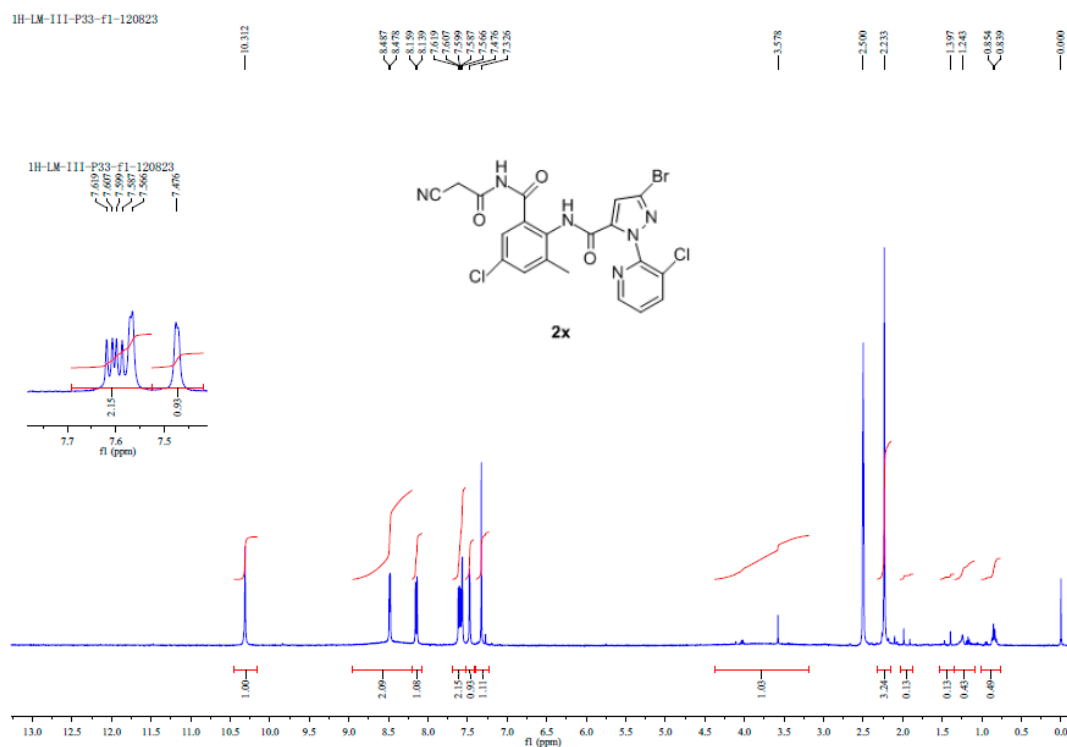Figure S24. <sup>1</sup>H-NMR spectrum of compound **2x**.

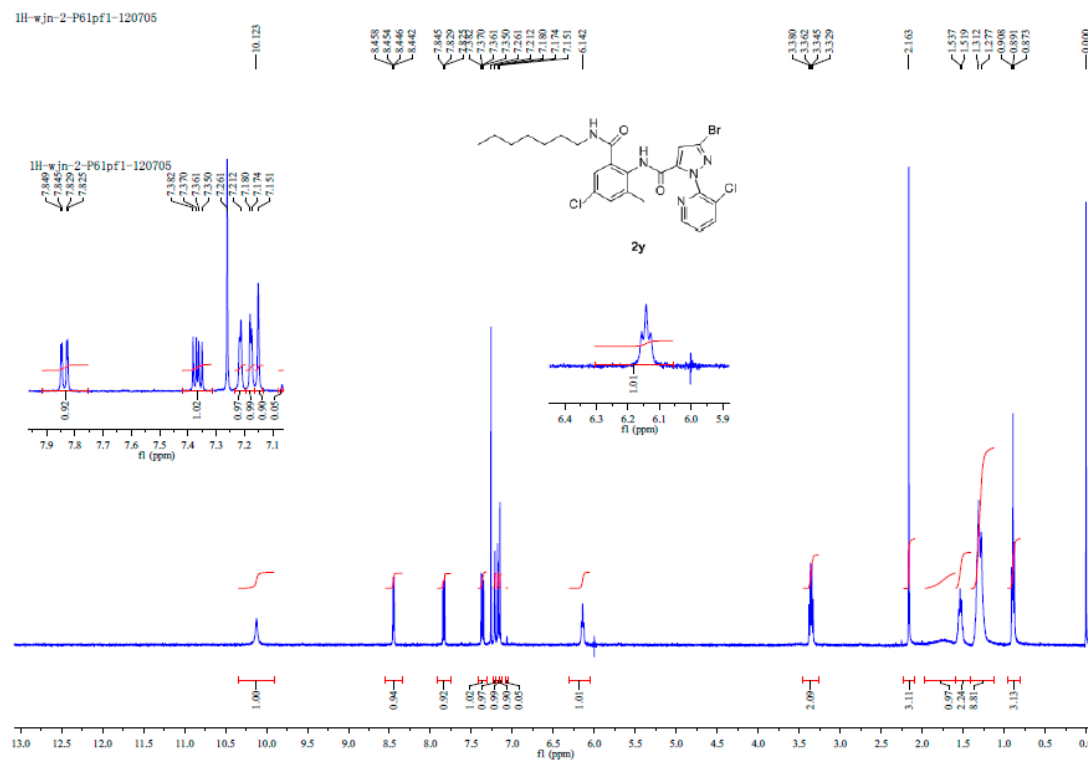

Figure S25.  $^1\text{H}$ -NMR spectrum of compound **2y**.

## 2. C-NMR

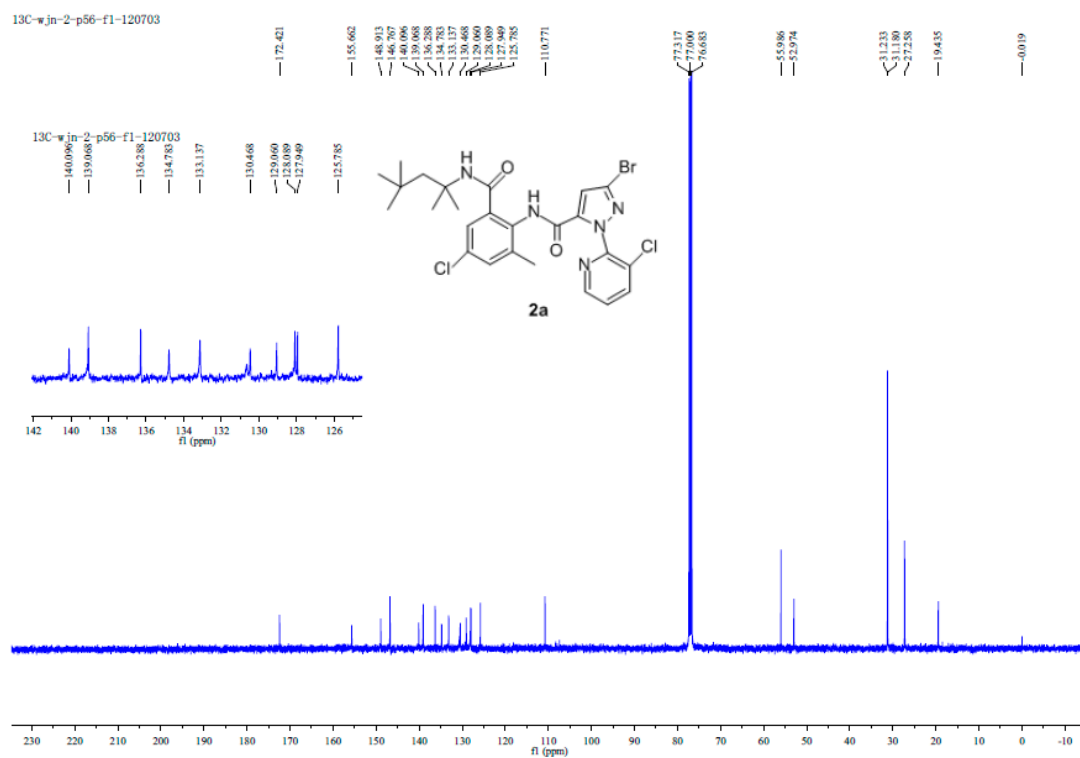

Figure S26.  $^{13}\text{C}$ -NMR spectrum of compound **2a**.

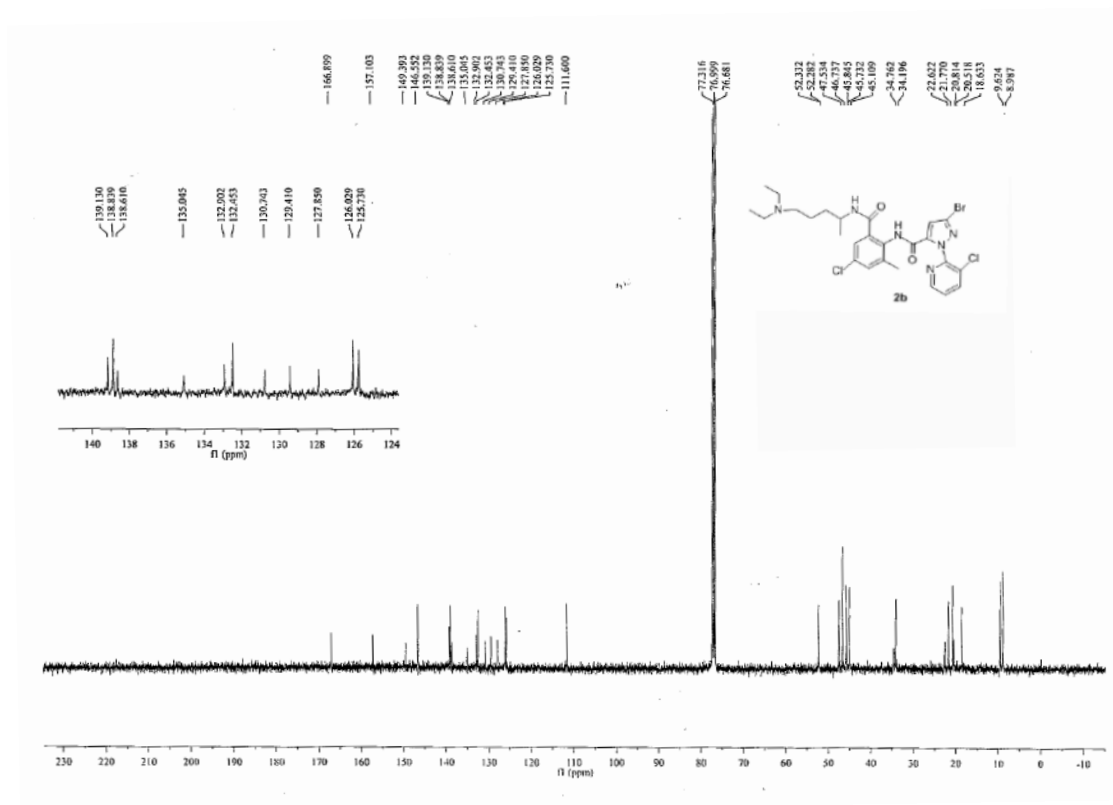

Figure S27.  $^{13}\text{C}$ -NMR spectrum of compound **2b**.

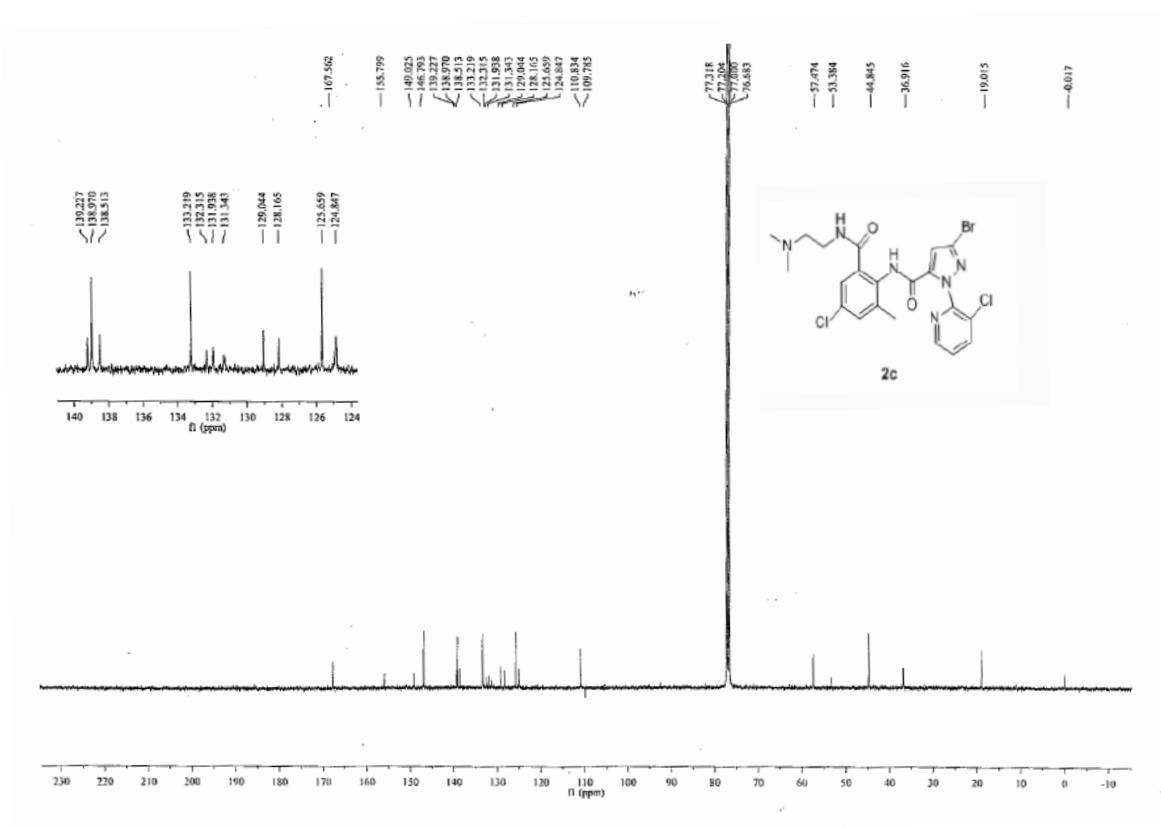

Figure S28.  $^{13}\text{C}$ -NMR spectrum of compound **2c**.

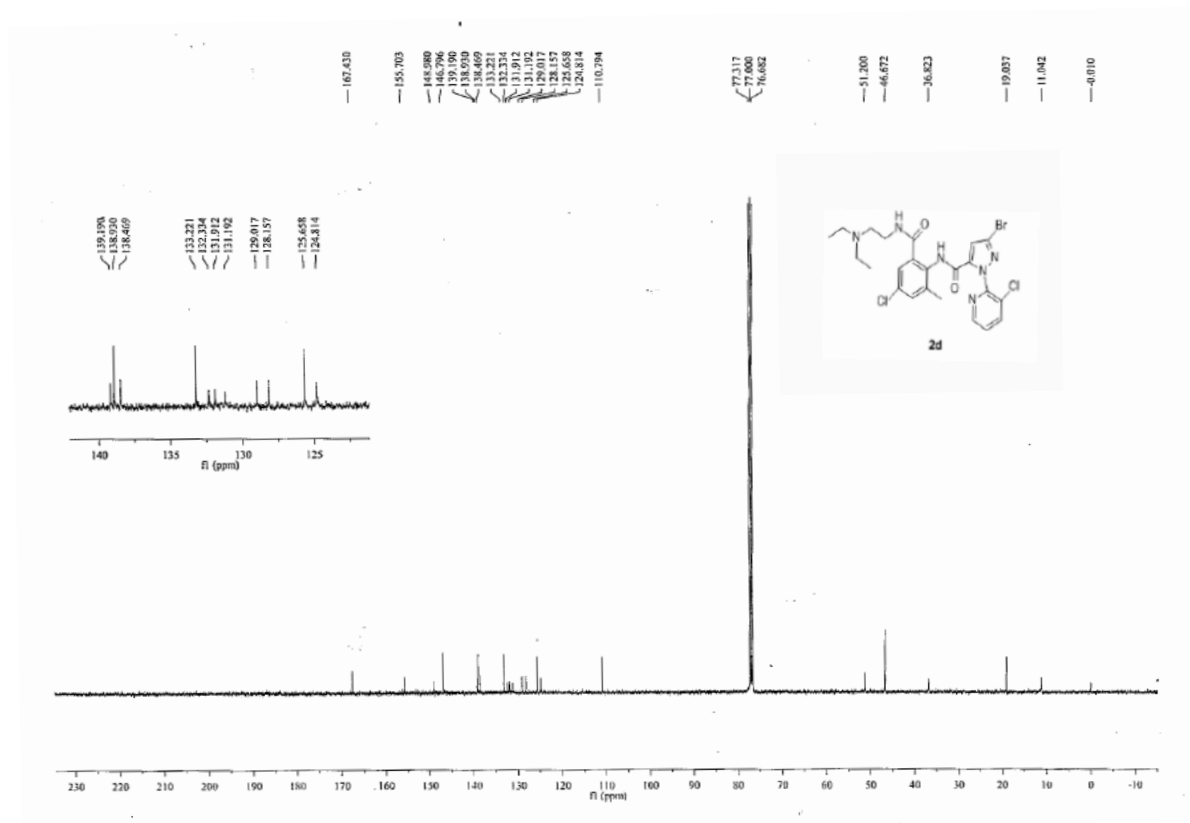

**Figure S29.**  $^{13}\text{C}$ -NMR spectrum of compound **2d**.

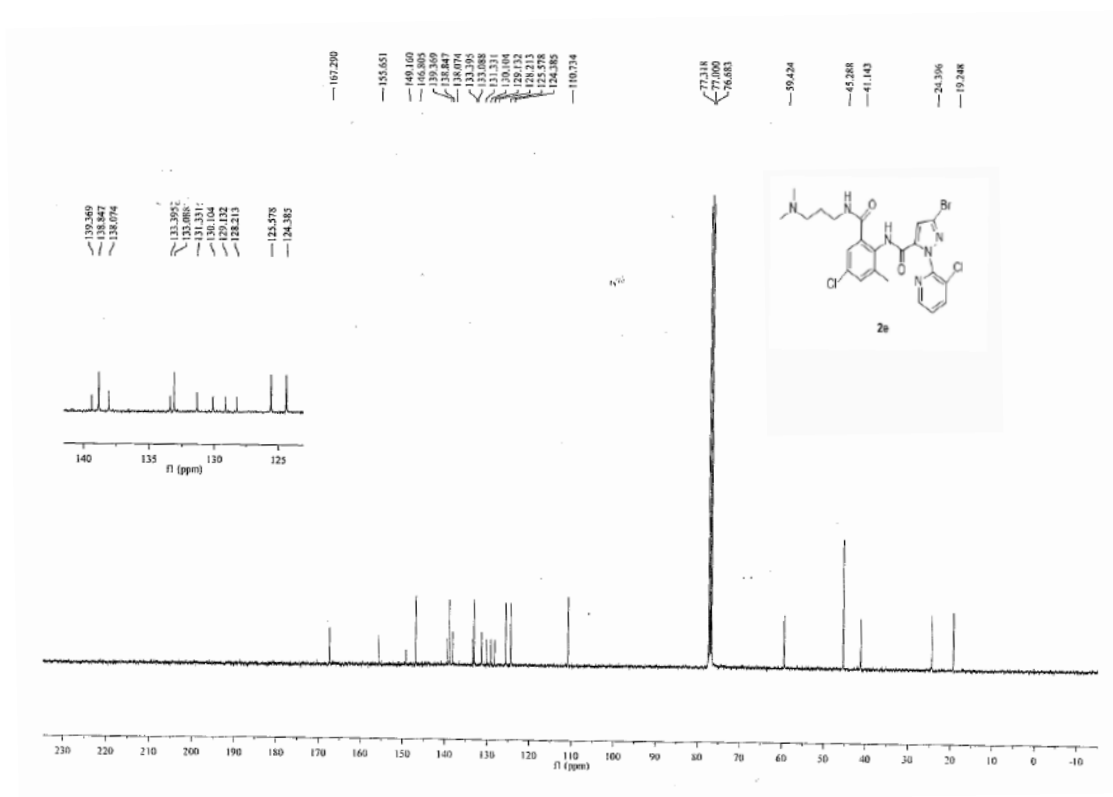

**Figure S30.**  $^{13}\text{C}$ -NMR spectrum of compound **2e**.

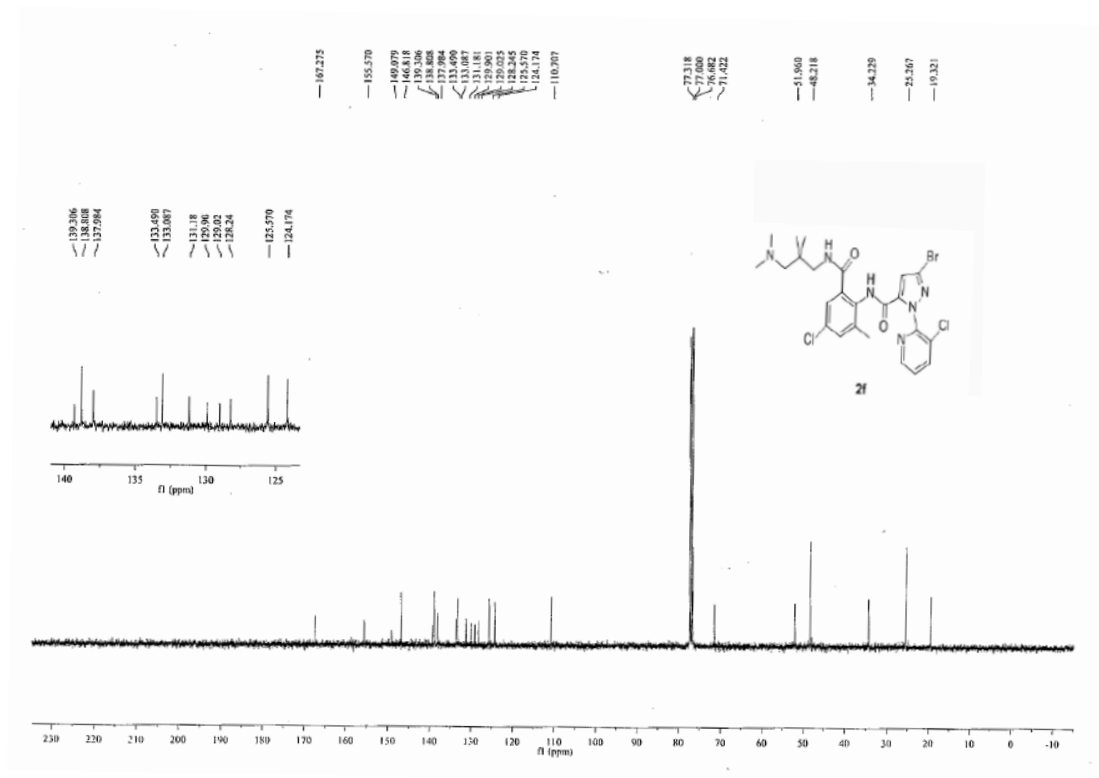

Figure S31. <sup>13</sup>C-NMR spectrum of compound 2f.

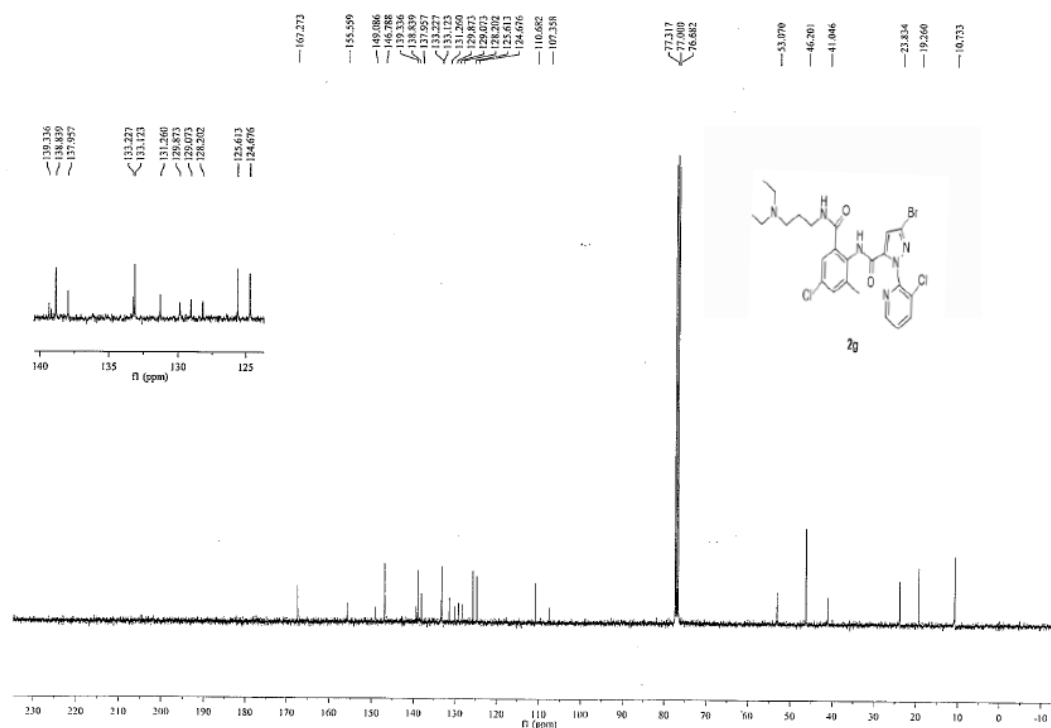

Figure S32. <sup>13</sup>C-NMR spectrum of compound 2g.



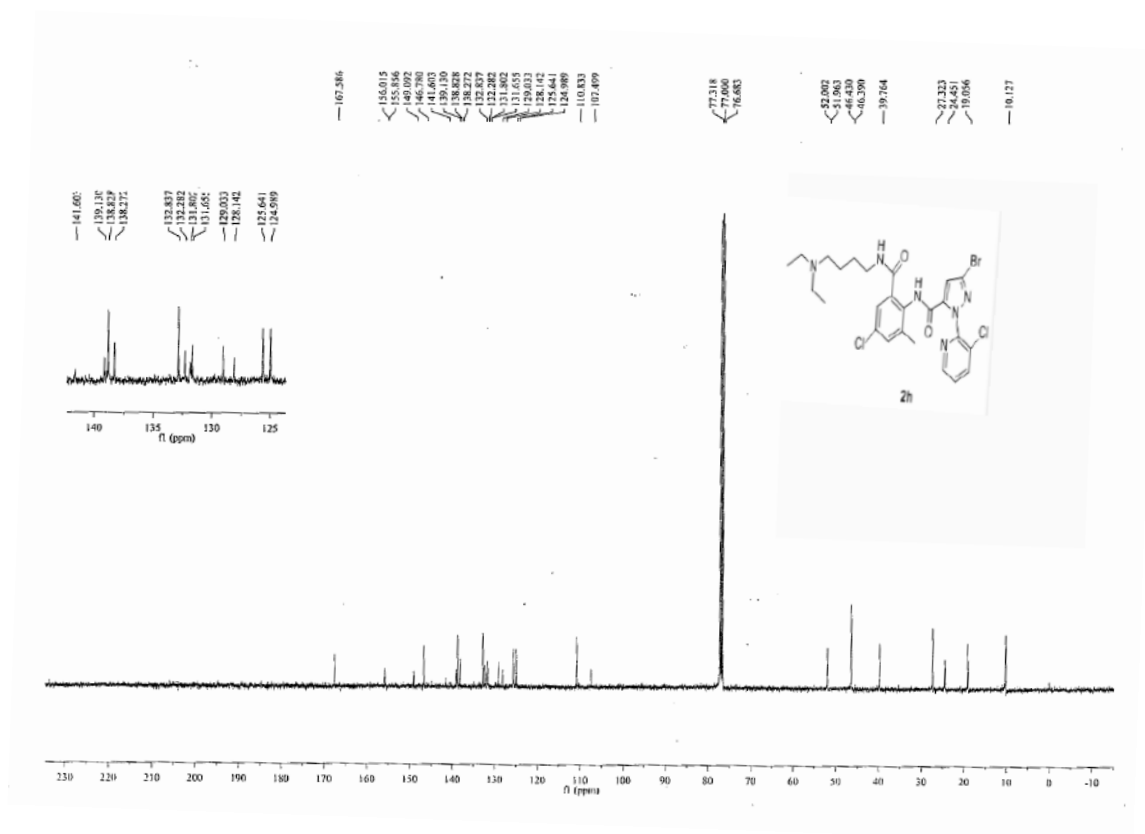

**Figure S33.**  $^{13}\text{C}$ -NMR spectrum of compound **2h**.

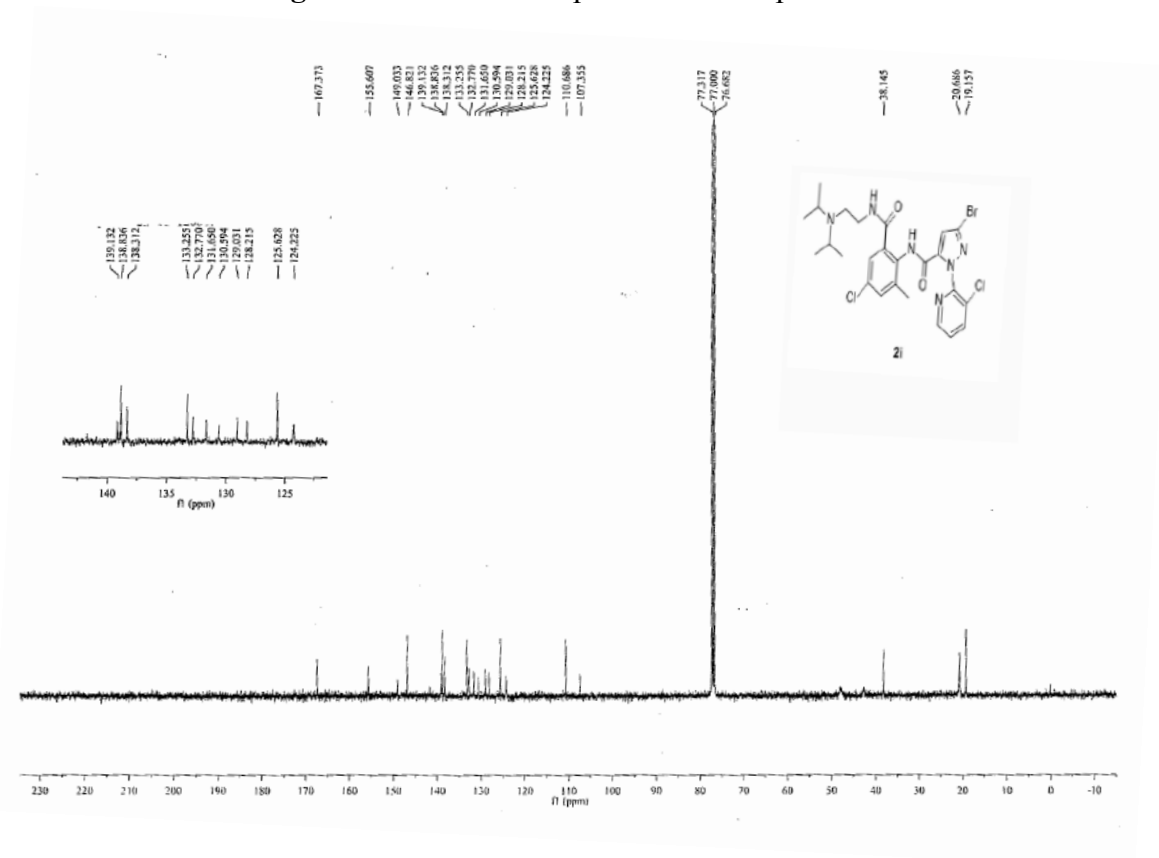

**Figure S34.**  $^{13}\text{C}$ -NMR spectrum of compound **2i**.

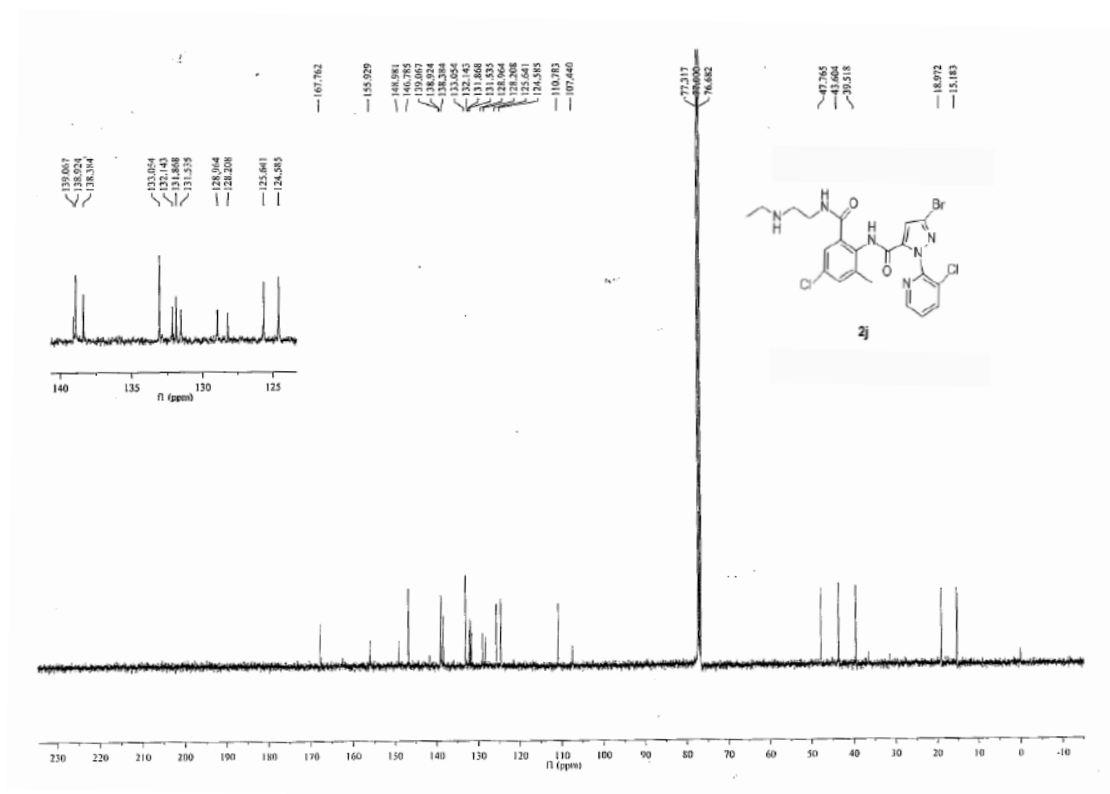

**Figure S35.  $^{13}\text{C}$ -NMR spectrum of compound 2j.**

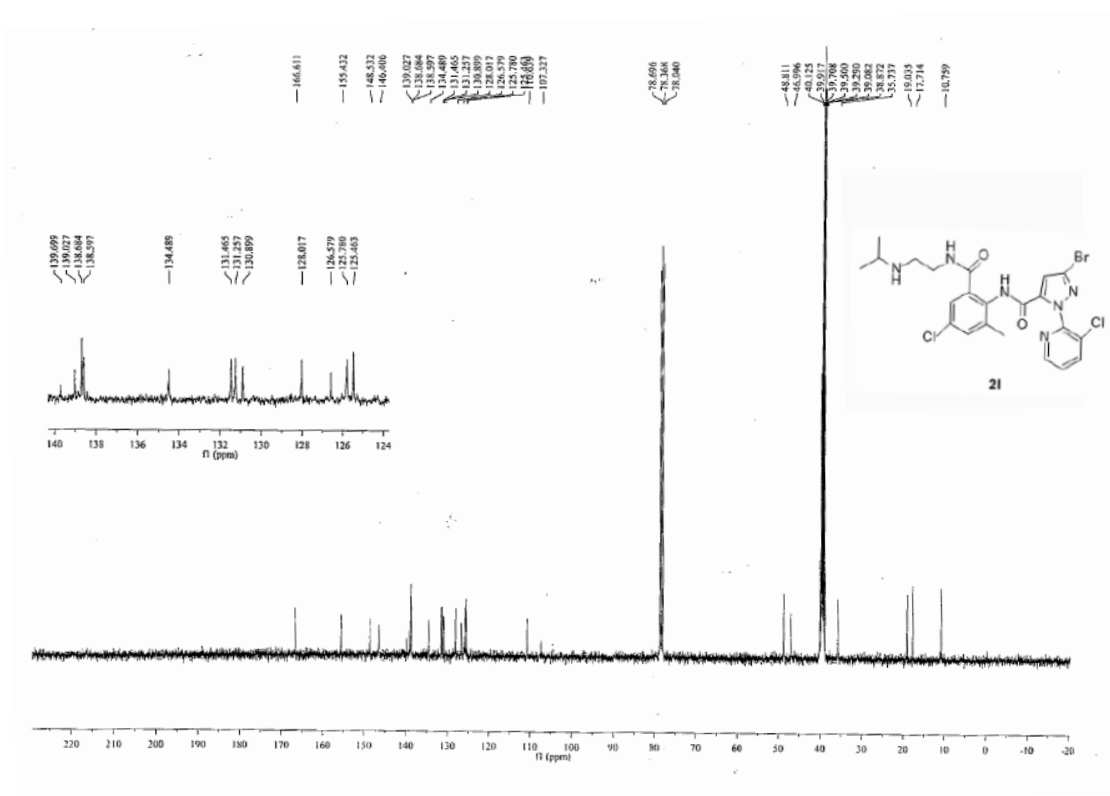

**Figure S36.  $^{13}\text{C}$ -NMR spectrum of compound 2k.**

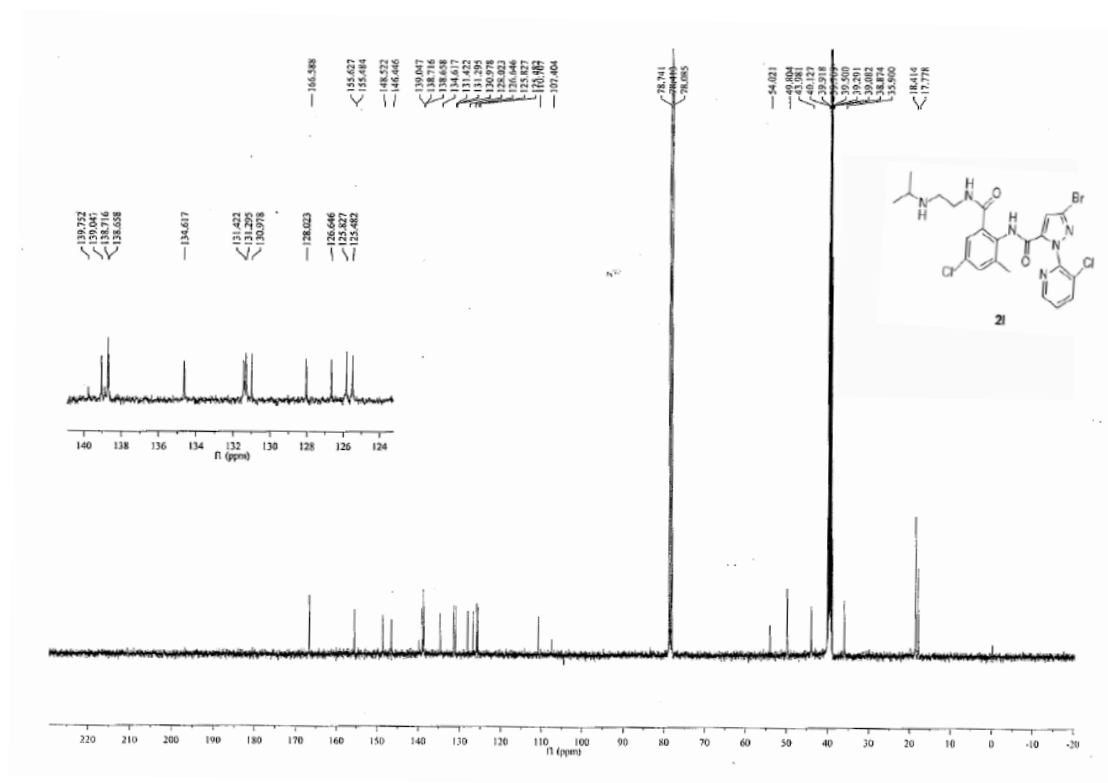

**Figure S37.**  $^{13}\text{C}$ -NMR spectrum of compound **2l**.

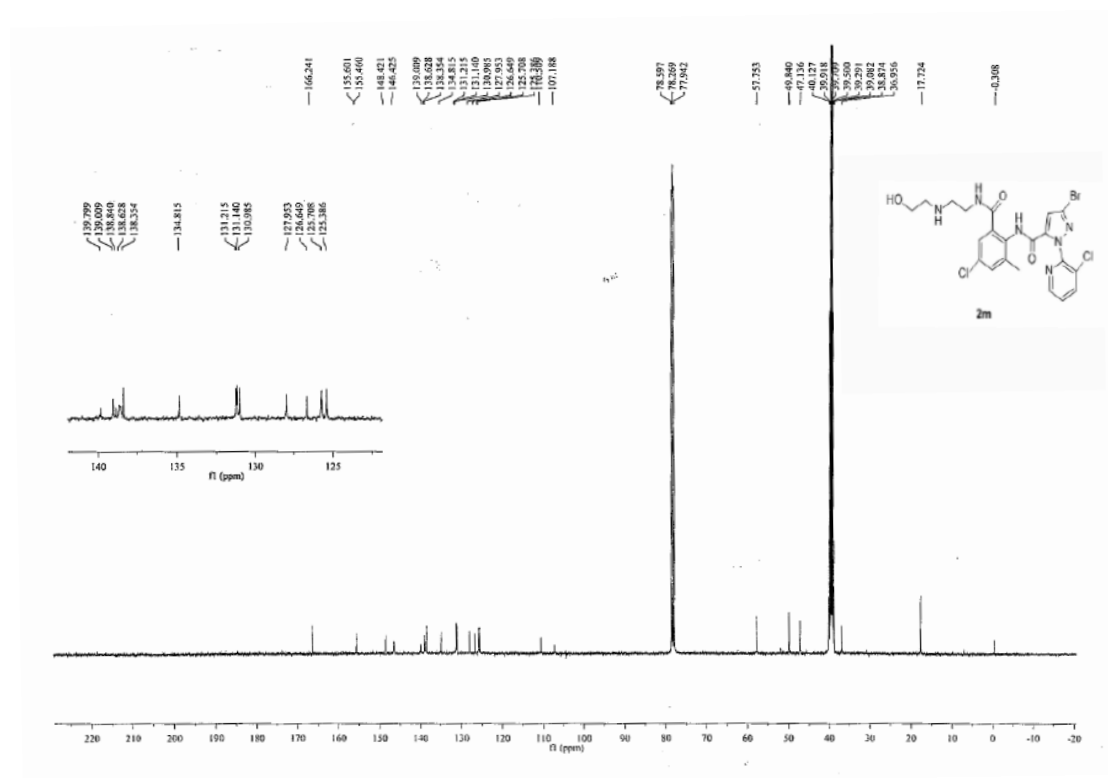

**Figure S38.**  $^{13}\text{C}$ -NMR spectrum of compound **2m**.

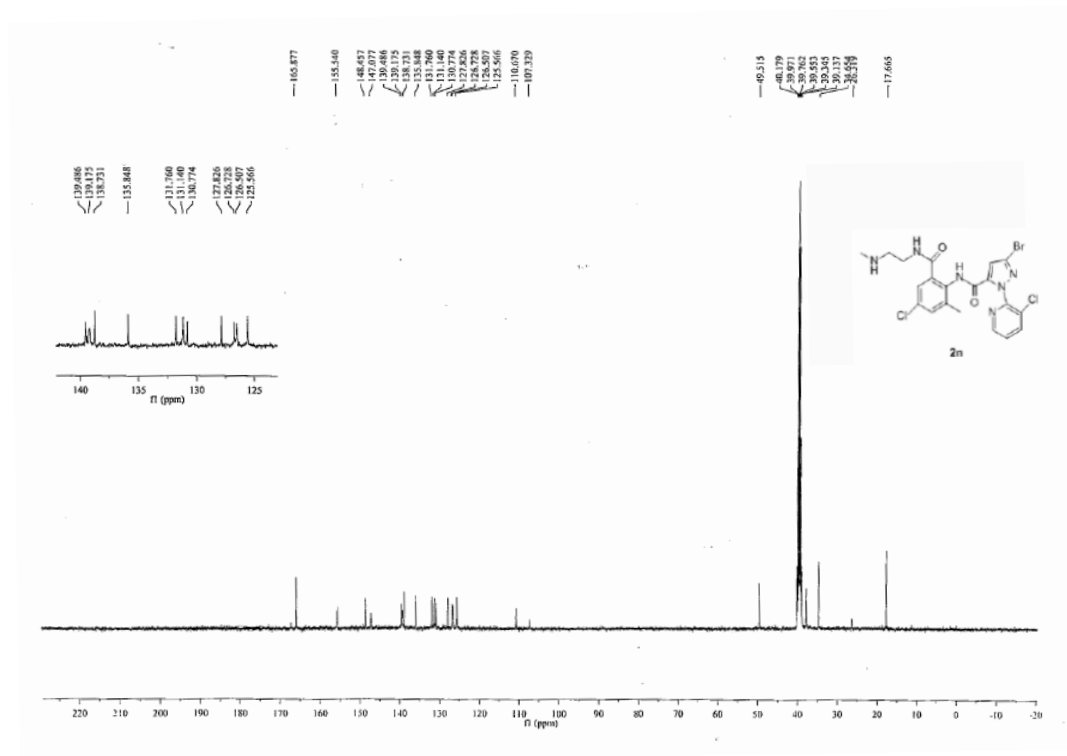

**Figure S39.**  $^{13}\text{C}$ -NMR spectrum of compound **2n**.

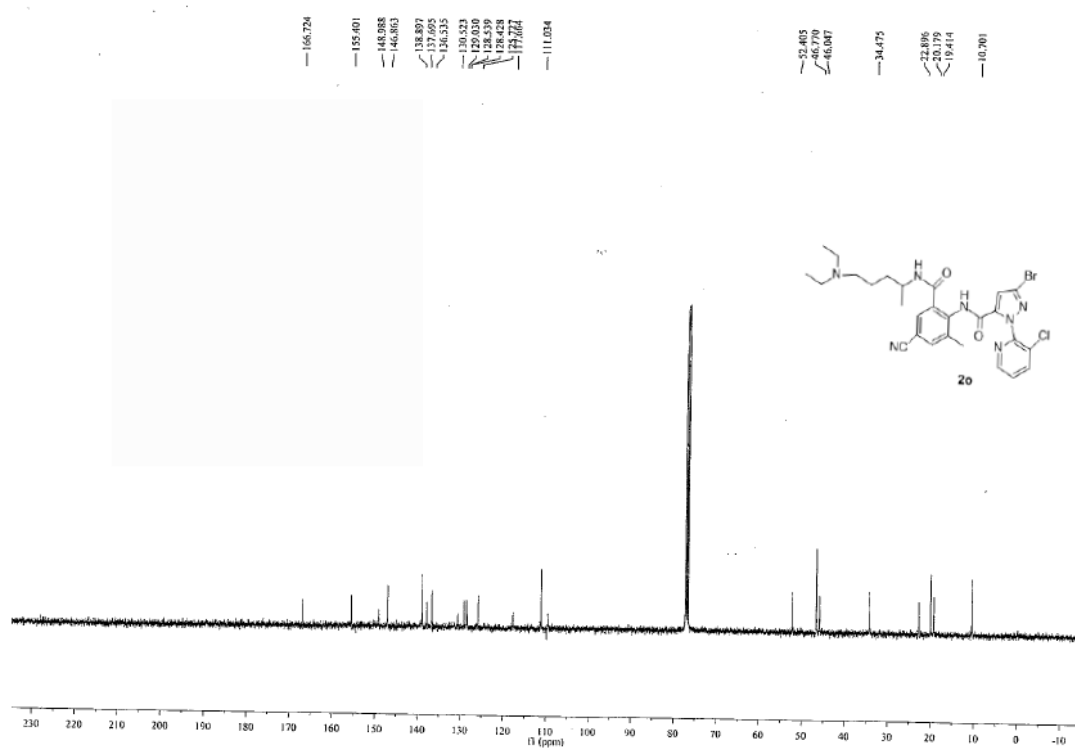

**Figure S40.**  $^{13}\text{C}$ -NMR spectrum of compound **2o**.

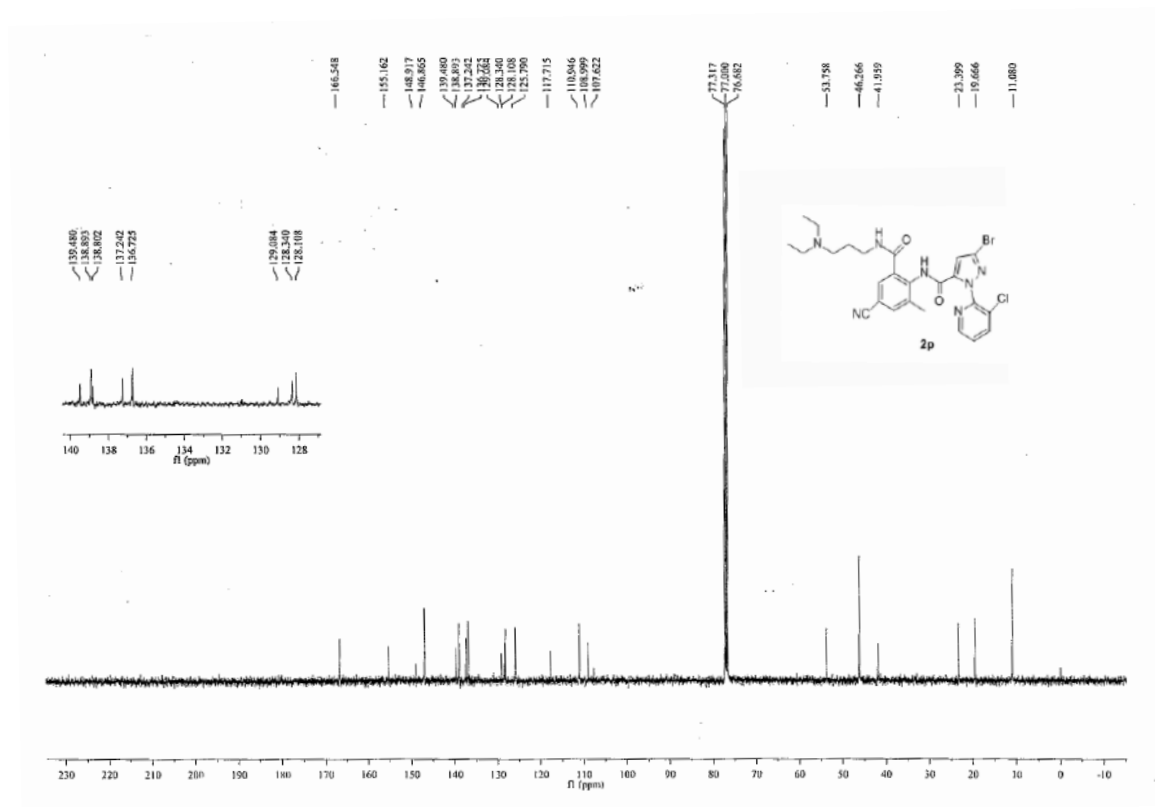

Figure S41.  $^{13}\text{C}$ -NMR spectrum of compound **2p**.

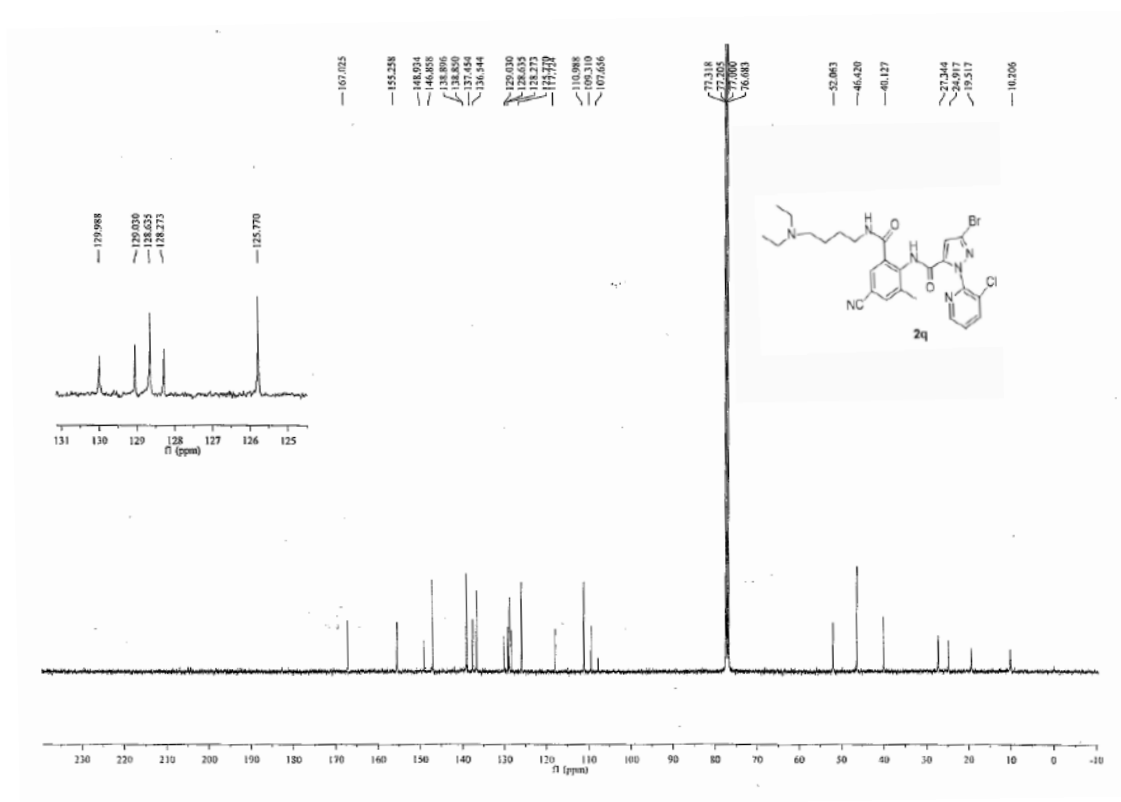

Figure S42.  $^{13}\text{C}$ -NMR spectrum of compound **2q**.

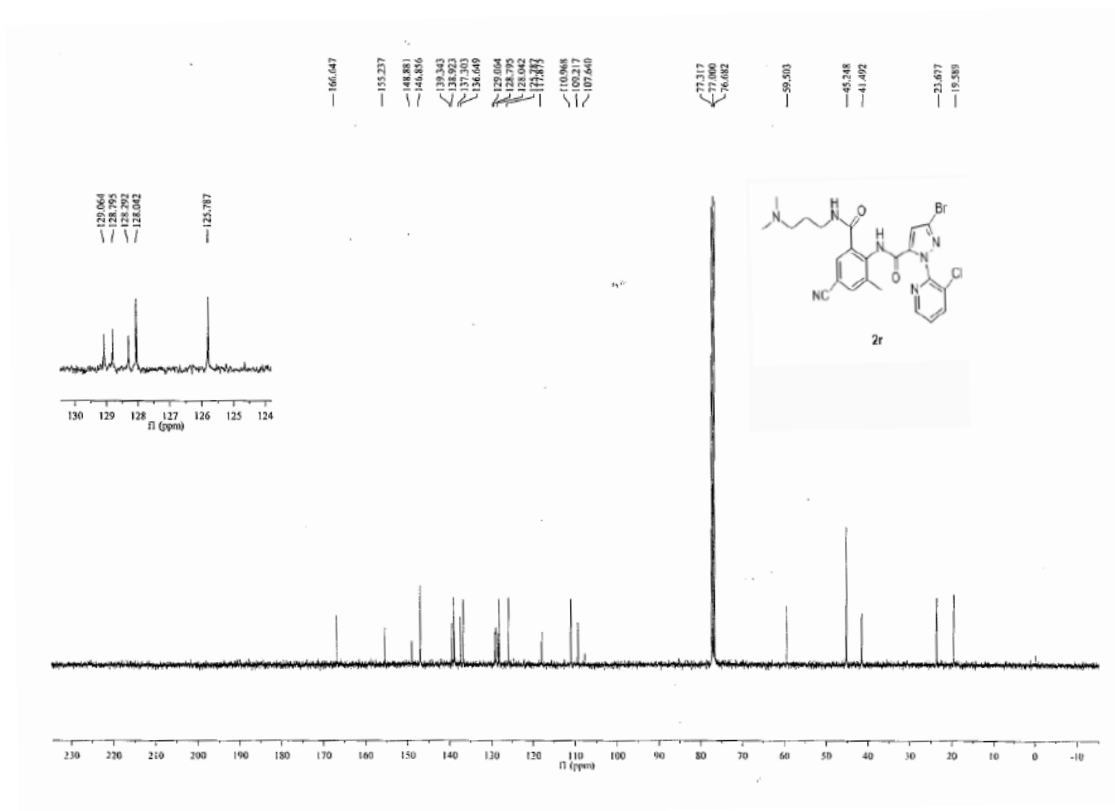

Figure S43.  $^{13}\text{C}$ -NMR spectrum of compound 2r.

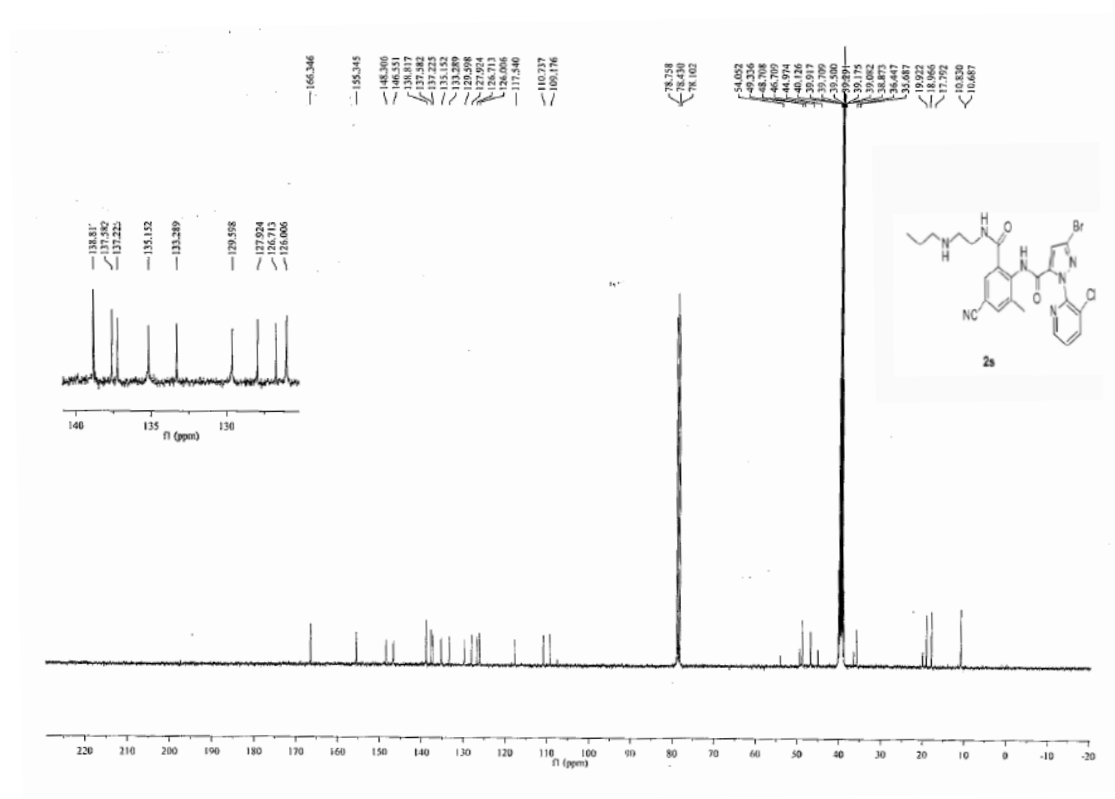

Figure S44.  $^{13}\text{C}$ -NMR spectrum of compound 2s.

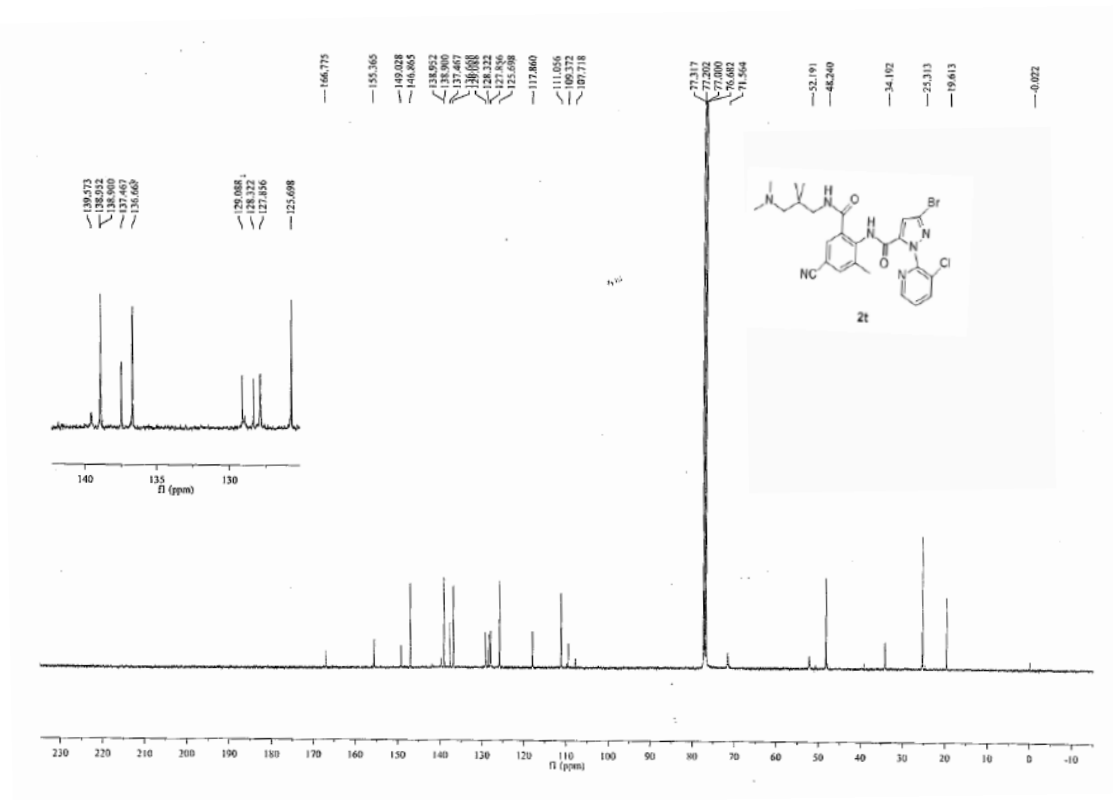

**Figure S45.**  $^{13}\text{C}$ -NMR spectrum of compound **2t**.

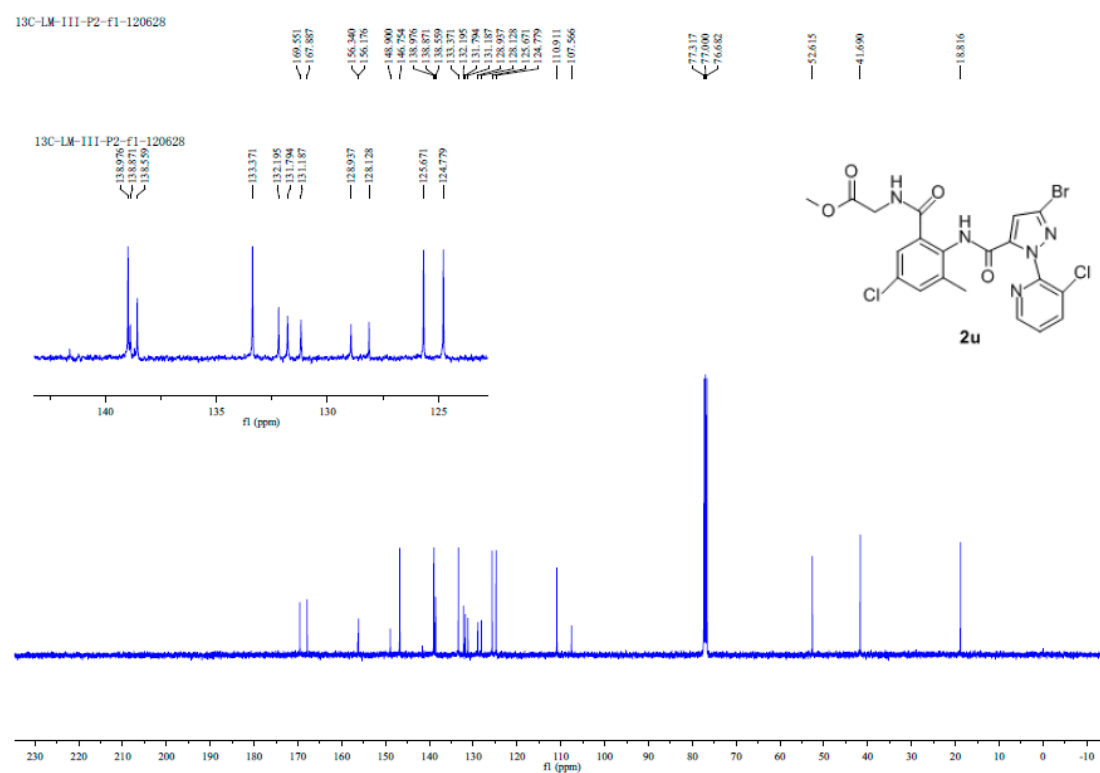

**Figure S46.**  $^{13}\text{C}$ -NMR spectrum of compound **2u**.

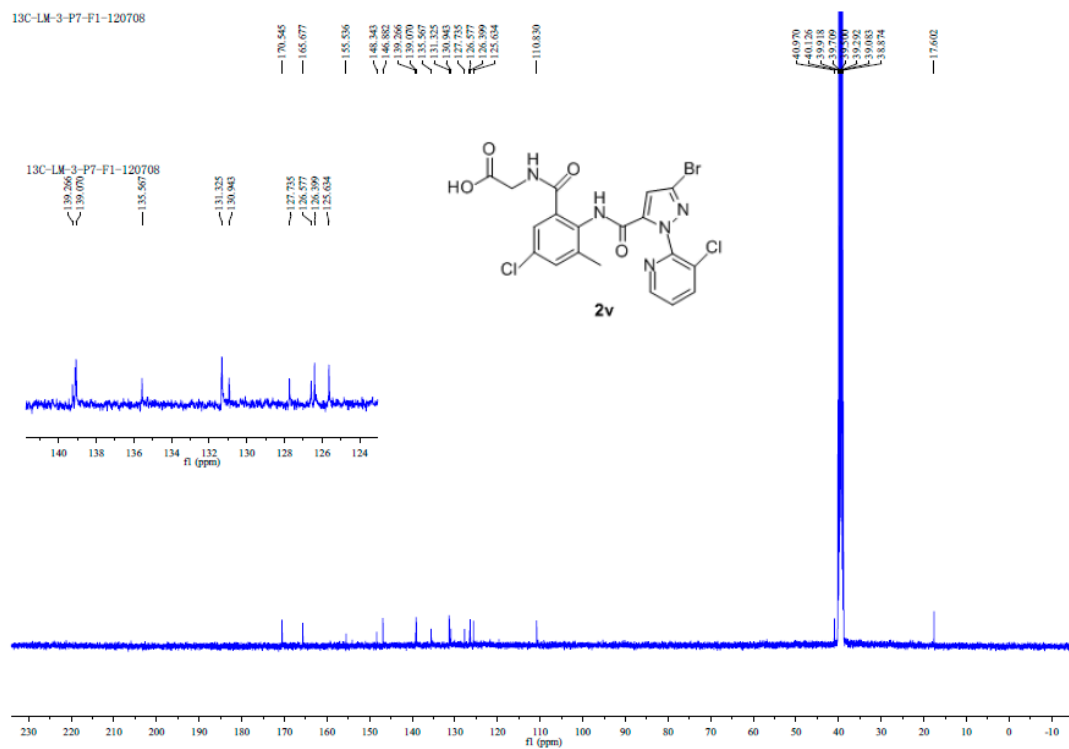

Figure S47.  $^{13}\text{C}$ -NMR spectrum of compound **2v**.

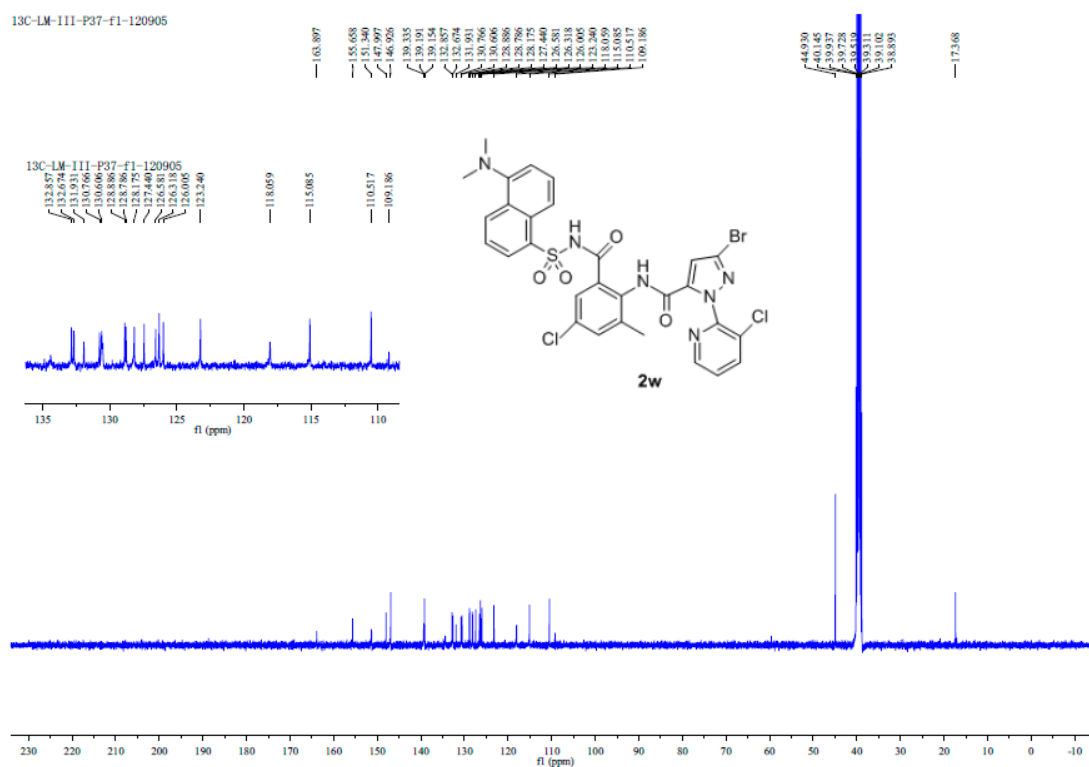

Figure S48.  $^{13}\text{C}$ -NMR spectrum of compound **2w**.



**<sup>13</sup>C NMR** (CDCl<sub>3</sub>) of **2y** (120708):

Chemical structure of **2y** is shown above the spectrum.

**13C NMR peaks (ppm):**

- 167.942
- 156.563
- 146.092
- 146.789
- 138.813
- 138.725
- 133.221
- 133.221
- 132.645
- 132.256
- 131.968
- 129.000
- 128.211
- 128.211
- 125.634
- 124.346
- 111.029
- 77.317
- 77.000
- 76.682
- 40.342
- 31.683
- 29.372
- 28.911
- 28.609
- 22.598
- 18.700
- 14.064
- 0.021

**13C NMR spectrum (ppm):**

The spectrum shows peaks corresponding to the chemical structure of **2y**. Key peaks are labeled with their chemical shifts in ppm: 138.813, 138.725, 133.221, 132.645, 132.256, 131.968, 129.000, 128.211, 125.634, 124.346, 111.029, 77.317, 77.000, 76.682, 40.342, 31.683, 29.372, 28.911, 28.609, 22.598, 18.700, 14.064, and -0.021.

**Figure S50.**  $^{13}\text{C}$ -NMR spectrum of compound **2y**.

## 3. HR-MS

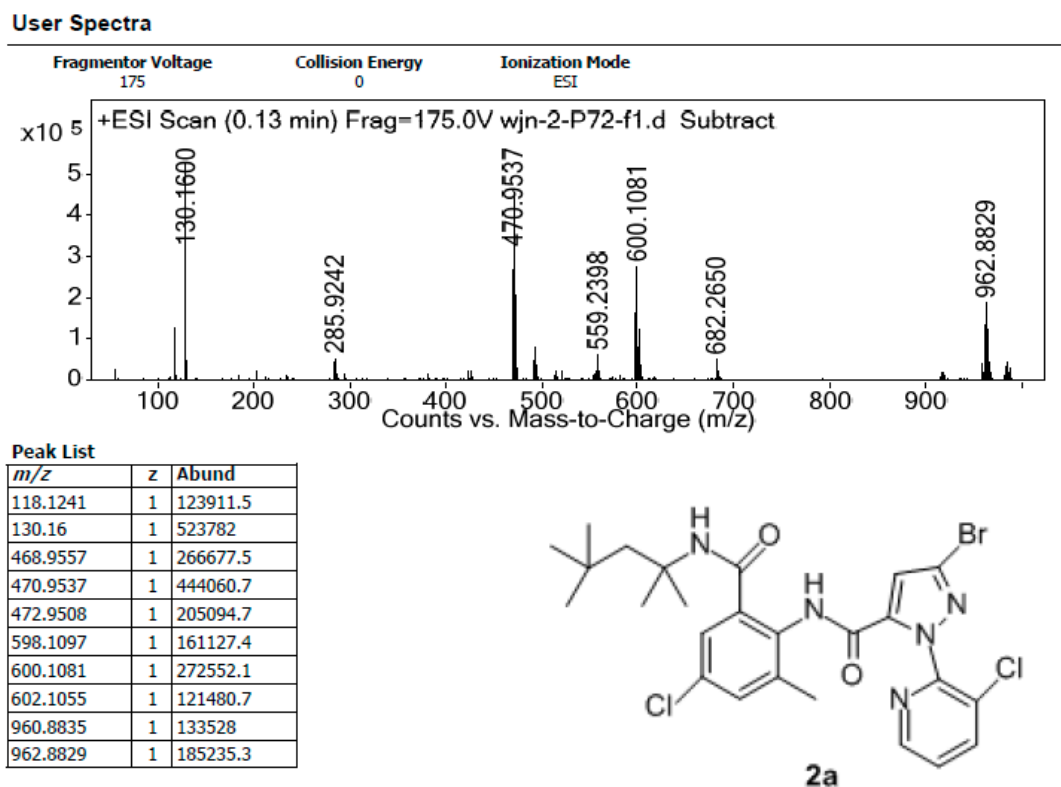Figure S51. HR-MS spectrum of compound **2a**.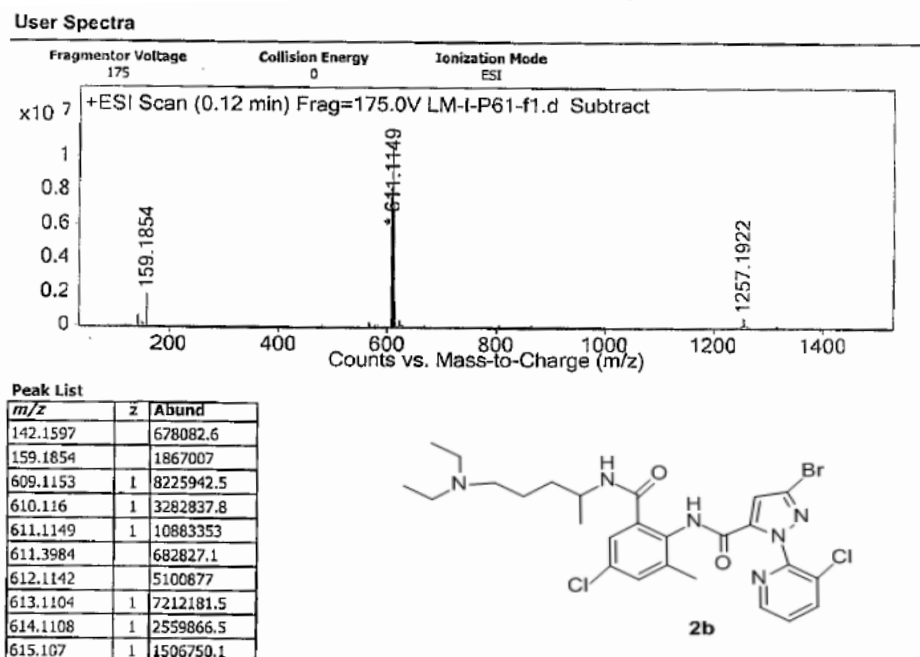Figure S52. HR-MS spectrum of compound **2b**.

## User Spectra

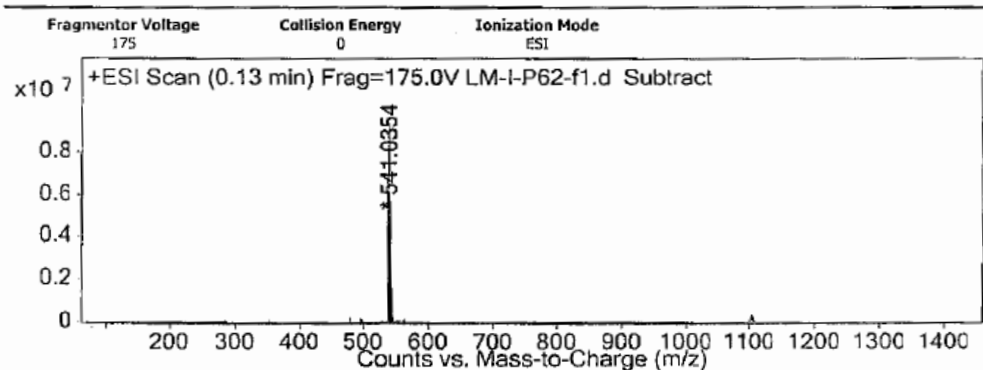

## Peak List

| m/z      | z | Abund     |
|----------|---|-----------|
| 539.0364 | 1 | 6839567.5 |
| 540.0376 | 1 | 2056720.6 |
| 541.0354 | 1 | 9539774   |
| 541.2309 |   | 842799.8  |
| 541.318  |   | 510480.3  |
| 542.0355 | 1 | 3298000   |
| 543.0314 | 1 | 5662681   |
| 543.2331 |   | 491559.4  |
| 544.0327 | 1 | 1541619   |
| 545.0291 | 1 | 1010198.8 |

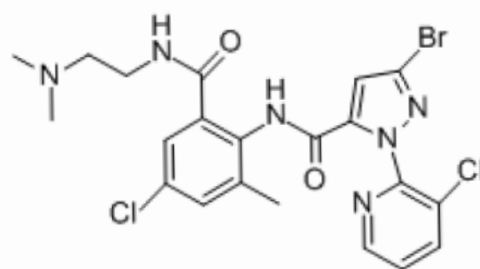**2c****Figure S53.** HR-MS spectrum of compound **2c**.

## User Spectra

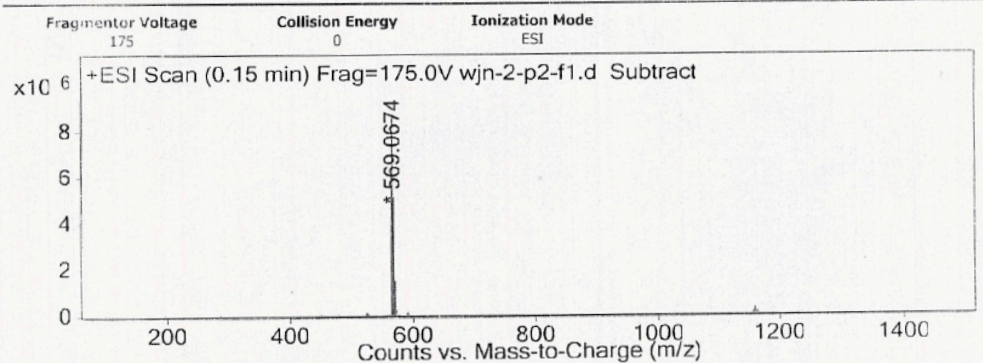

## Peak List

| m/z      | z | Abund     |
|----------|---|-----------|
| 567.0684 | 1 | 6086118   |
| 567.2721 |   | 485601.6  |
| 568.0699 | 1 | 1932571.3 |
| 569.0674 | 1 | 8710474   |
| 569.2649 |   | 751107.5  |
| 570.0678 | 1 | 3081166   |
| 571.0637 | 1 | 5068411   |
| 571.2718 |   | 450103.3  |
| 572.0649 | 1 | 1456247.1 |
| 573.0618 | 1 | 887745.3  |

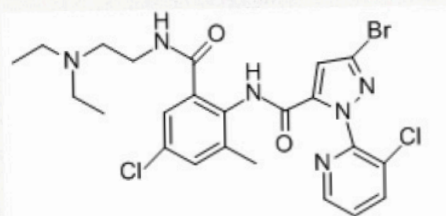**2d****Figure S54.** HR-MS spectrum of compound **2d**.

## User Spectra

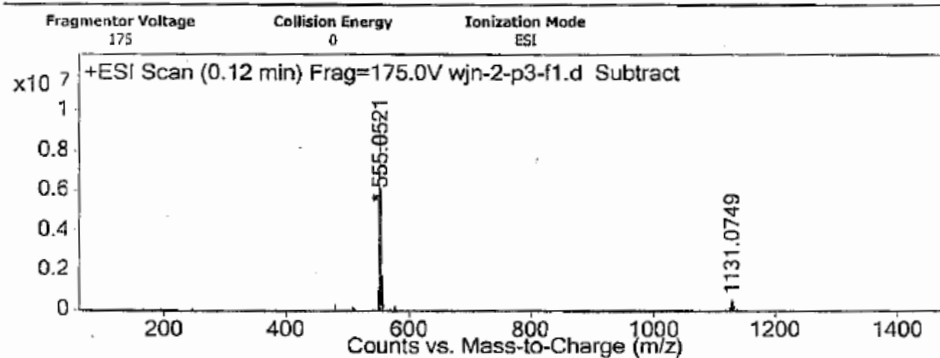

## Peak List

| m/z       | z | Abund     |
|-----------|---|-----------|
| 553.053   | 1 | 7179975.5 |
| 553.2544  |   | 508242.2  |
| 554.0542  | 1 | 2293498   |
| 555.0521  | 1 | 9874690   |
| 555.2473  |   | 907458.8  |
| 556.0521  | 1 | 3656231.8 |
| 557.048   | 1 | 6022600.5 |
| 558.0491  | 1 | 1734178   |
| 559.0455  | 1 | 1089732.3 |
| 1131.0749 |   | 530363.4  |

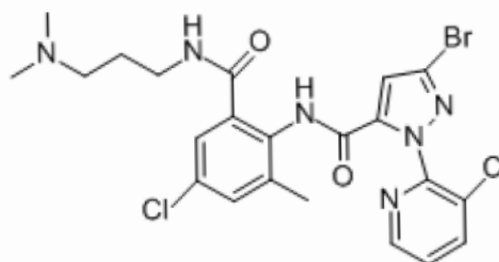

2e

Figure S55. HR-MS spectrum of compound 2e.

## User Spectra

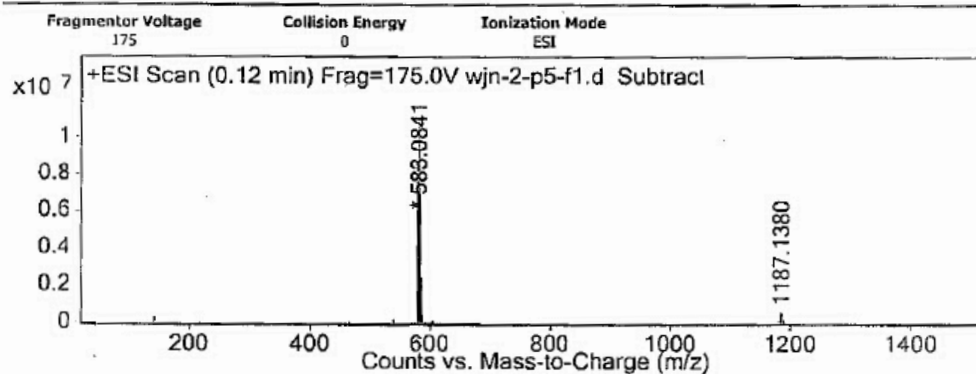

## Peak List

| m/z      | z | Abund     |
|----------|---|-----------|
| 581.0845 | 1 | 8488467   |
| 581.2841 |   | 680058.8  |
| 582.0851 | 1 | 3105136.8 |
| 583.0841 | 1 | 11037943  |
| 583.362  |   | 676582.5  |
| 584.0834 | 1 | 4881015   |
| 585.0796 | 1 | 7297667.5 |
| 586.08   | 1 | 2419787.5 |
| 587.0761 | 1 | 1465293   |
| 1187.138 |   | 654161.3  |

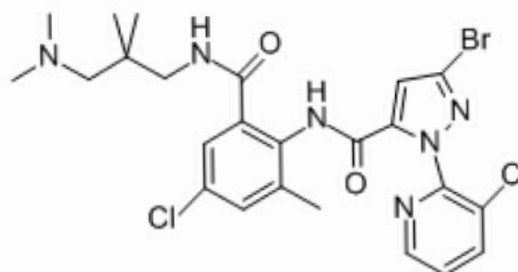

2f

Figure S56. HR-MS spectrum of compound 2f.

## User Spectra

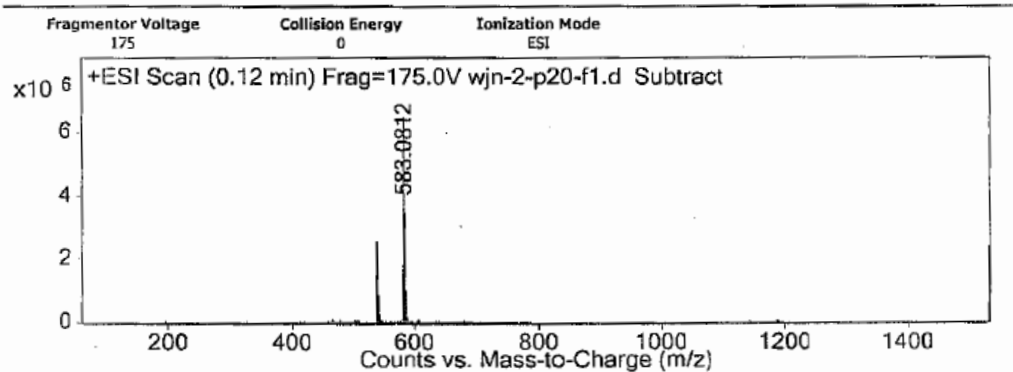

## Peak List

| m/z      | z | Abund     |
|----------|---|-----------|
| 537.1326 | 1 | 2552710.5 |
| 538.1362 | 1 | 720627.1  |
| 539.1301 | 1 | 2541021.5 |
| 541.1289 | 1 | 862659.5  |
| 581.0826 | 1 | 4242290.5 |
| 582.0848 | 1 | 1267022   |
| 583.0812 | 1 | 6434385   |
| 584.0824 | 1 | 2121076.8 |
| 585.078  | 1 | 3442944.8 |
| 586.0807 | 1 | 962253.3  |

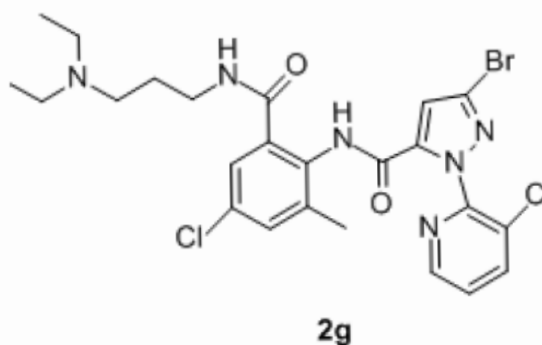Figure S57. HR-MS spectrum of compound **2g**.

## User Spectra

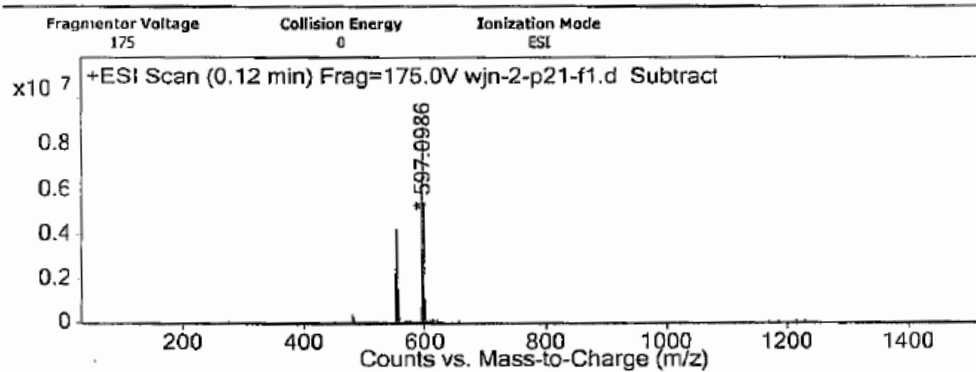

## Peak List

| m/z      | z | Abund     |
|----------|---|-----------|
| 551.1492 | 1 | 4181802.8 |
| 552.1514 | 1 | 1304508.4 |
| 553.1466 | 1 | 4186059.5 |
| 555.1439 | 1 | 1518909   |
| 595.0996 | 1 | 6517437   |
| 596.101  | 1 | 2253578.3 |
| 597.0986 | 1 | 9178428   |
| 598.0989 | 1 | 3565117.5 |
| 599.0949 | 1 | 5430470.5 |
| 600.0959 | 1 | 1722469.9 |

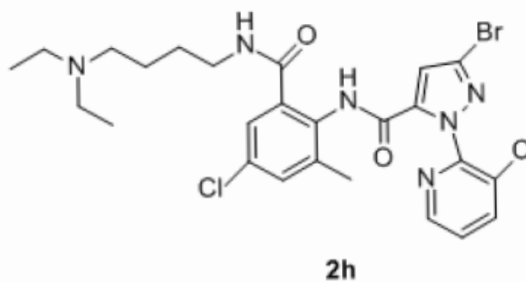Figure S58. HR-MS spectrum of compound **2h**.

## User Spectra

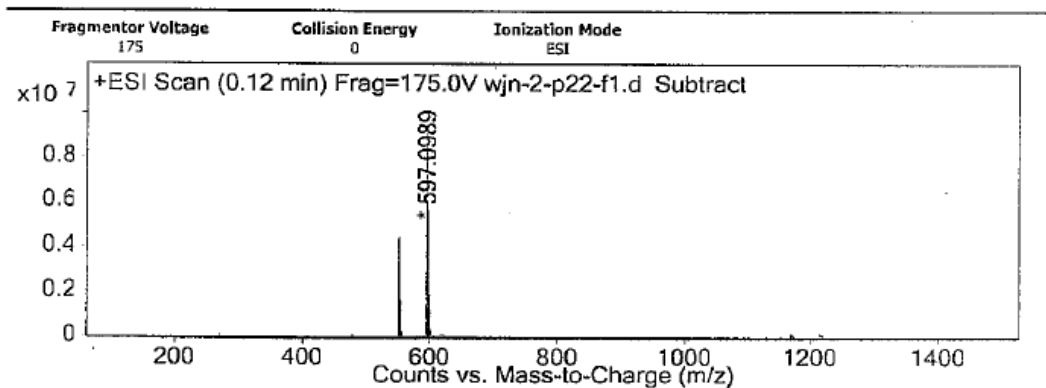

## Peak List

| m/z      | z | Abund     |
|----------|---|-----------|
| 551.1496 | 1 | 4350049   |
| 552.1518 | 1 | 1389648.5 |
| 553.147  | 1 | 4416446   |
| 555.144  | 1 | 1634510.1 |
| 595.0999 | 1 | 6730949.5 |
| 596.1012 | 1 | 2348590.8 |
| 597.0989 | 1 | 9423324   |
| 598.0991 | 1 | 3727104.8 |
| 599.0951 | 1 | 5624904   |
| 600.0963 | 1 | 1790023.4 |

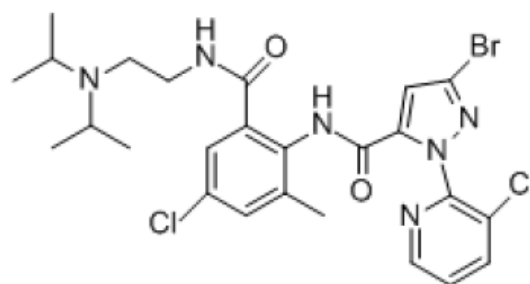

2i

Figure S59. HR-MS spectrum of compound 2i.

## User Spectra

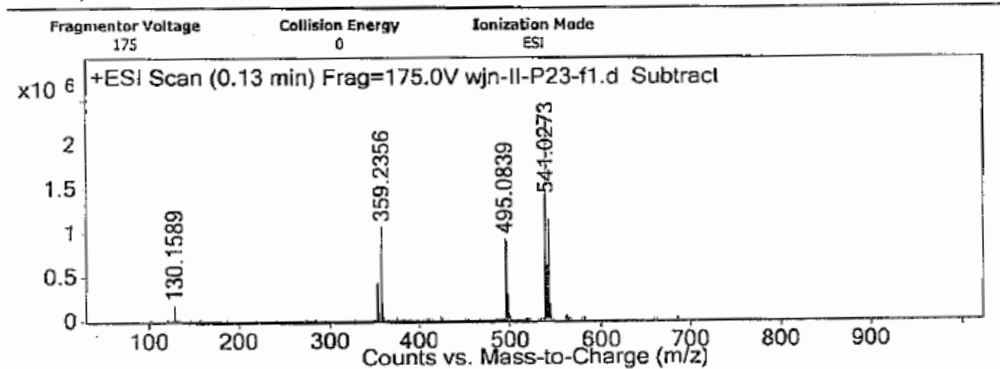

## Peak List

| m/z      | z | Abund     |
|----------|---|-----------|
| 354.2851 | 1 | 411753.6  |
| 359.2356 | 1 | 1065501.4 |
| 495.0839 | 1 | 923978.9  |
| 497.0793 | 1 | 890554.1  |
| 499.0815 | 1 | 294453.5  |
| 539.0295 | 1 | 1436330.8 |
| 540.0394 | 1 | 369547    |
| 541.0273 | 1 | 2306543   |
| 542.0368 | 1 | 628012.1  |
| 543.0255 | 1 | 1138796.8 |

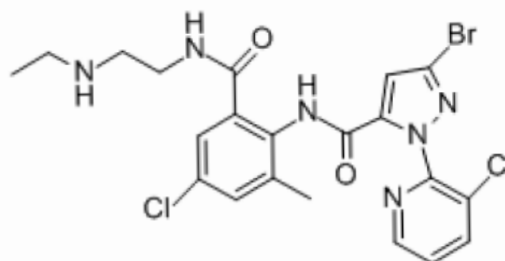

2j

Figure S60. HR-MS spectrum of compound 2j.

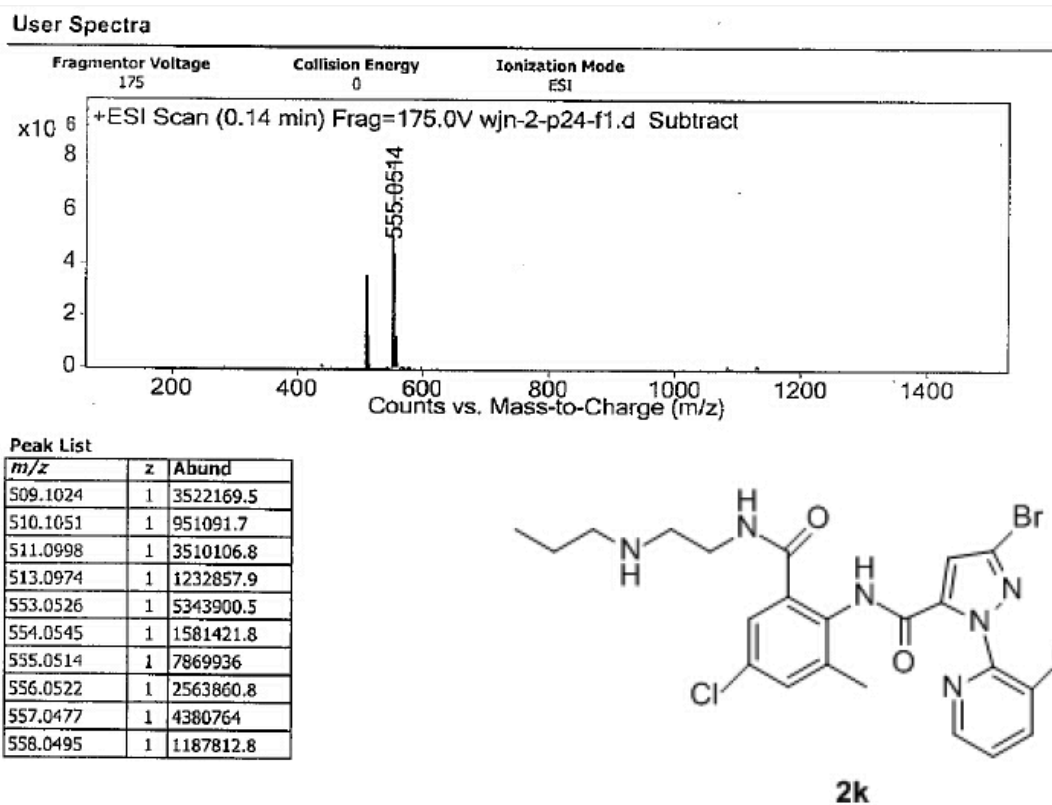

Figure S61. HR-MS spectrum of compound 2k.

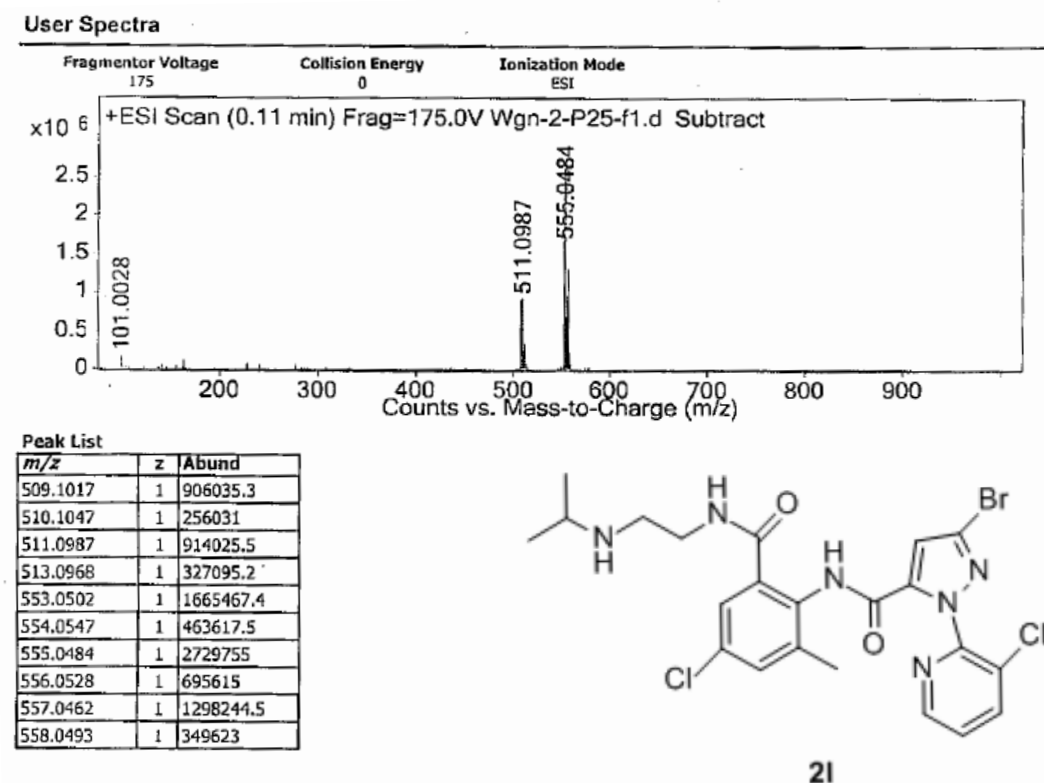

Figure S62. HR-MS spectrum of compound 2l.

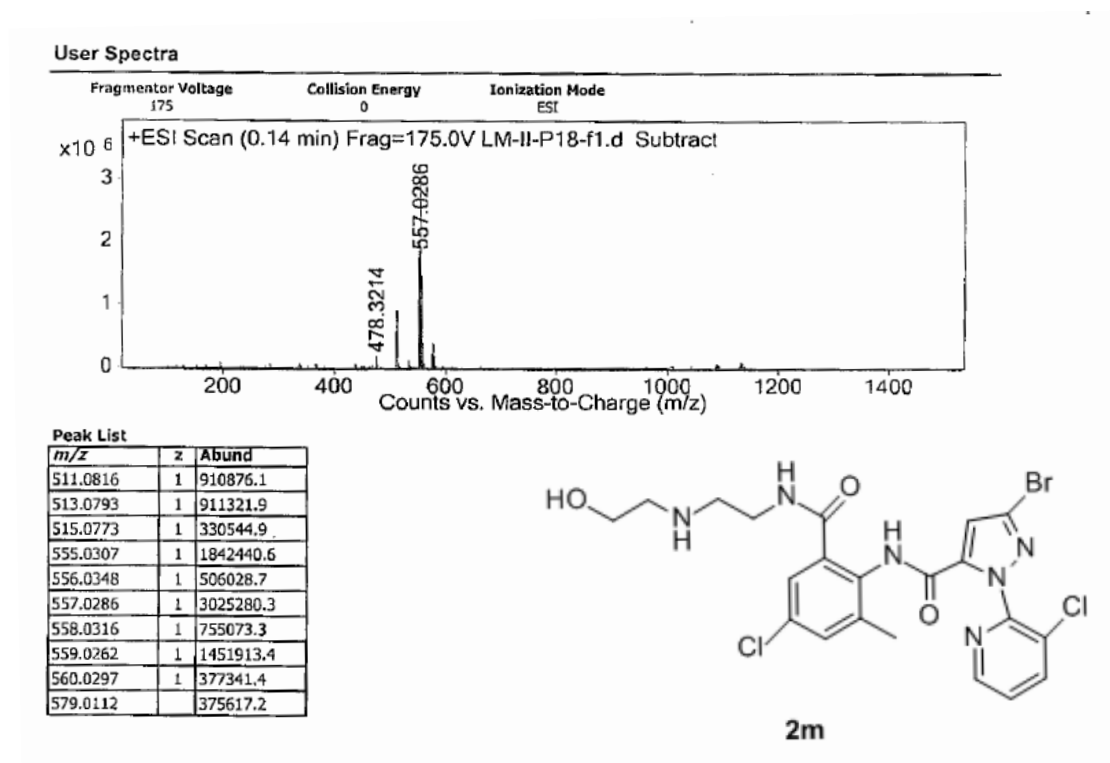Figure S63. HR-MS spectrum of compound **2m**.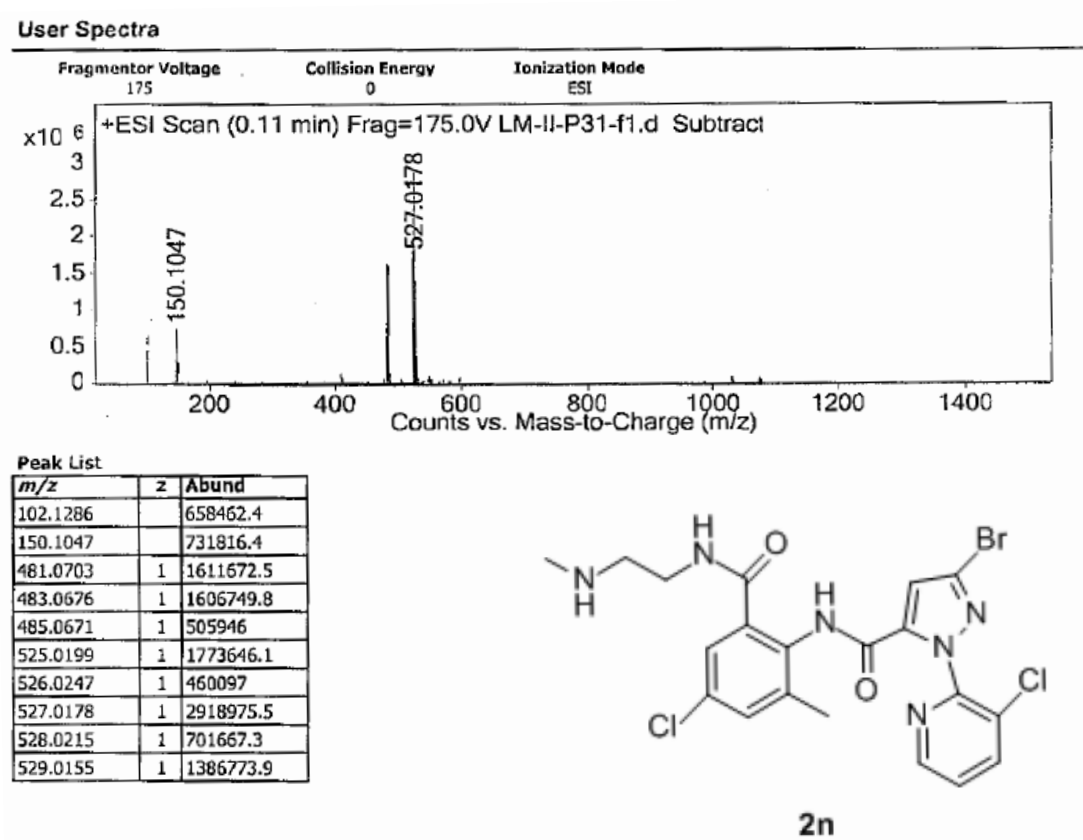Figure S64. HR-MS spectrum of compound **2n**.



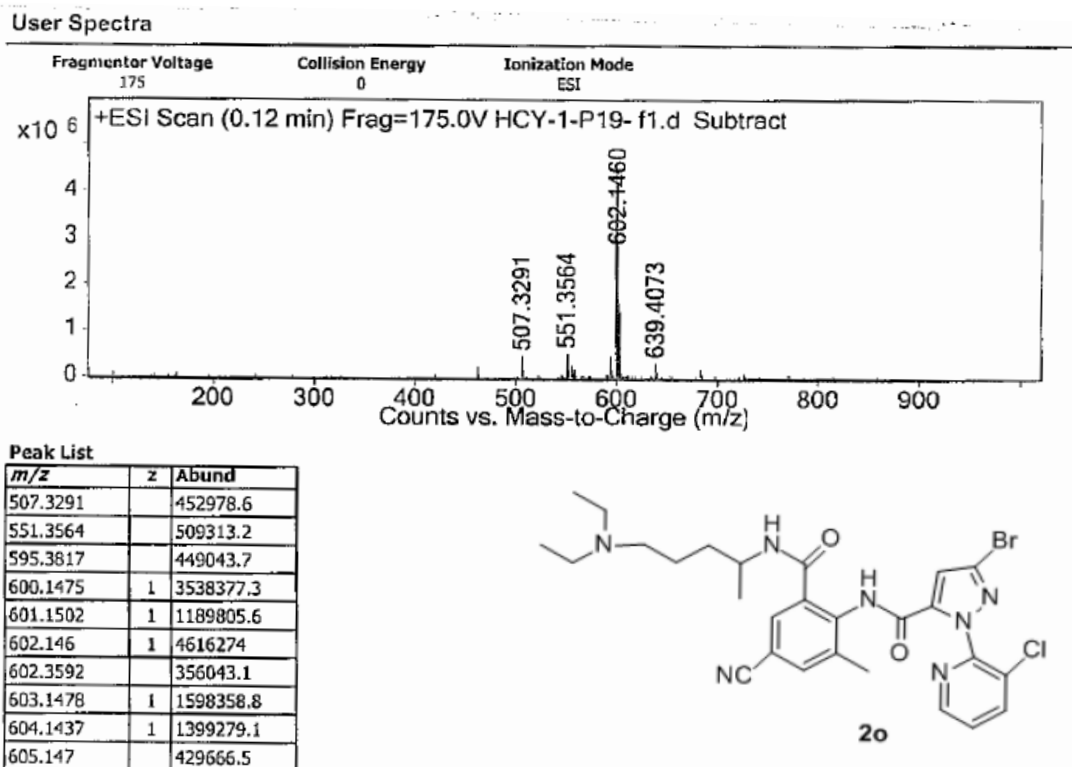Figure S65. HR-MS spectrum of compound **2o**.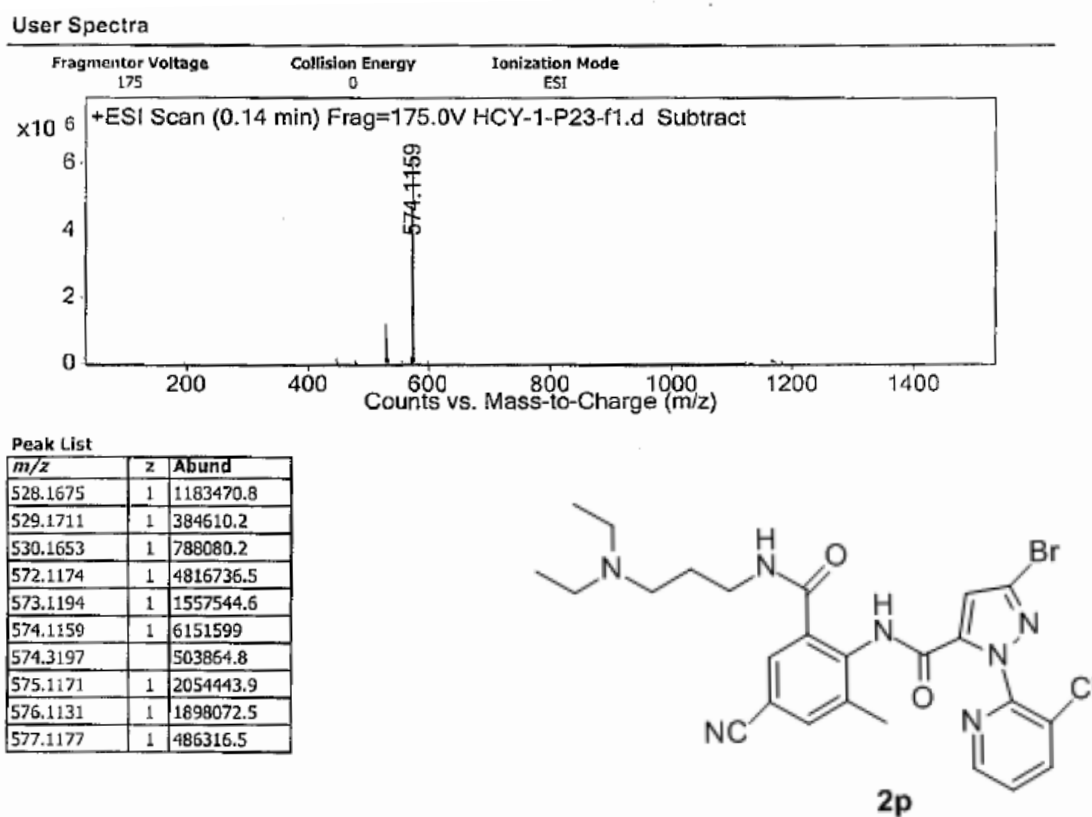Figure S66. HR-MS spectrum of compound **2p**.

## User Spectra

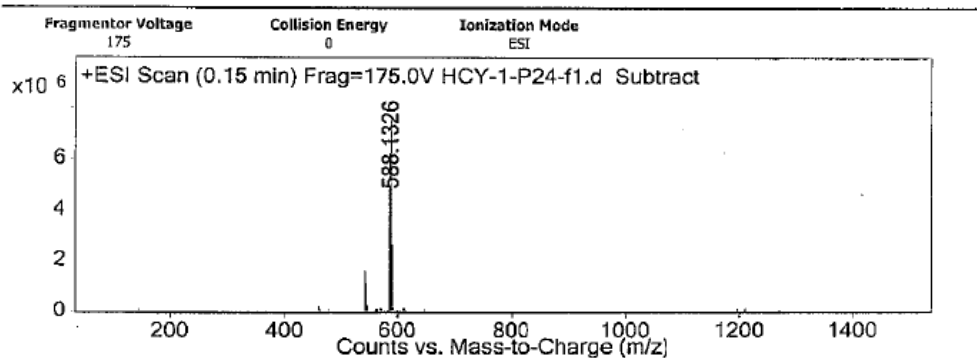

## Peak List

| m/z      | z | Abund     |
|----------|---|-----------|
| 542.183  | 1 | 1592069.8 |
| 543.188  | 1 | 493103.1  |
| 544.181  | 1 | 1082175.3 |
| 586.1339 | 1 | 6209576.5 |
| 587.1354 | 1 | 2182361.3 |
| 588.1326 | 1 | 7716560.5 |
| 588.3347 |   | 616641.9  |
| 589.1333 | 1 | 2874137   |
| 590.1291 | 1 | 2619945   |
| 591.1317 | 1 | 734669.8  |

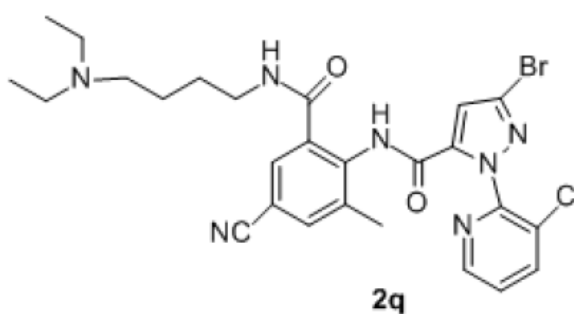Figure S67. HR-MS spectrum of compound **2q**.

## User Spectra

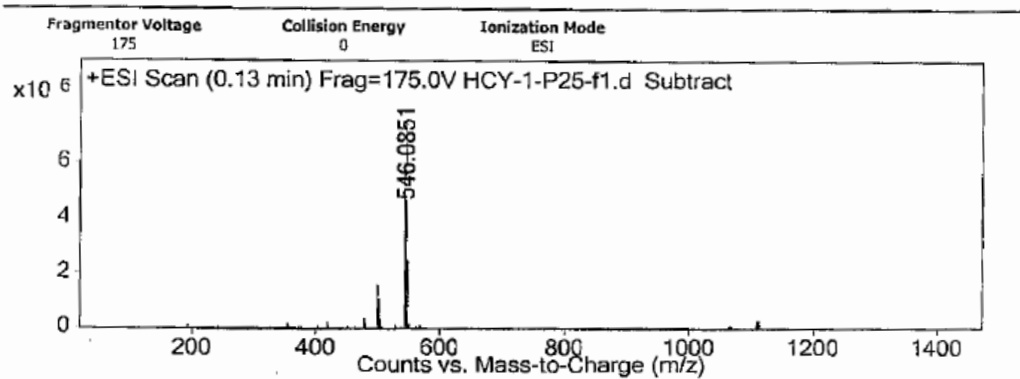

## Peak List

| m/z      | z | Abund     |
|----------|---|-----------|
| 500.1358 | 1 | 1529888.5 |
| 501.1398 | 1 | 457509.8  |
| 502.1341 | 1 | 1050037.1 |
| 544.0866 | 1 | 6038569   |
| 545.088  | 1 | 1890519.5 |
| 546.0851 | 1 | 7505626.5 |
| 546.2849 |   | 561615.4  |
| 547.086  | 1 | 2484396.8 |
| 548.0817 | 1 | 2462508   |
| 549.0856 | 1 | 611834.1  |

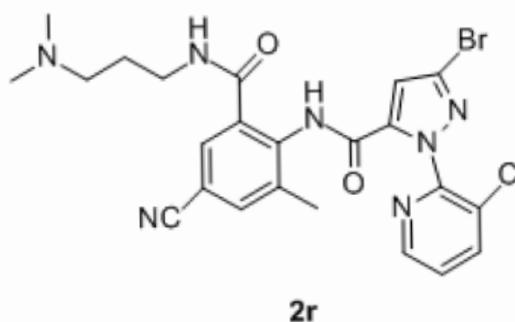Figure S68. HR-MS spectrum of compound **2r**.

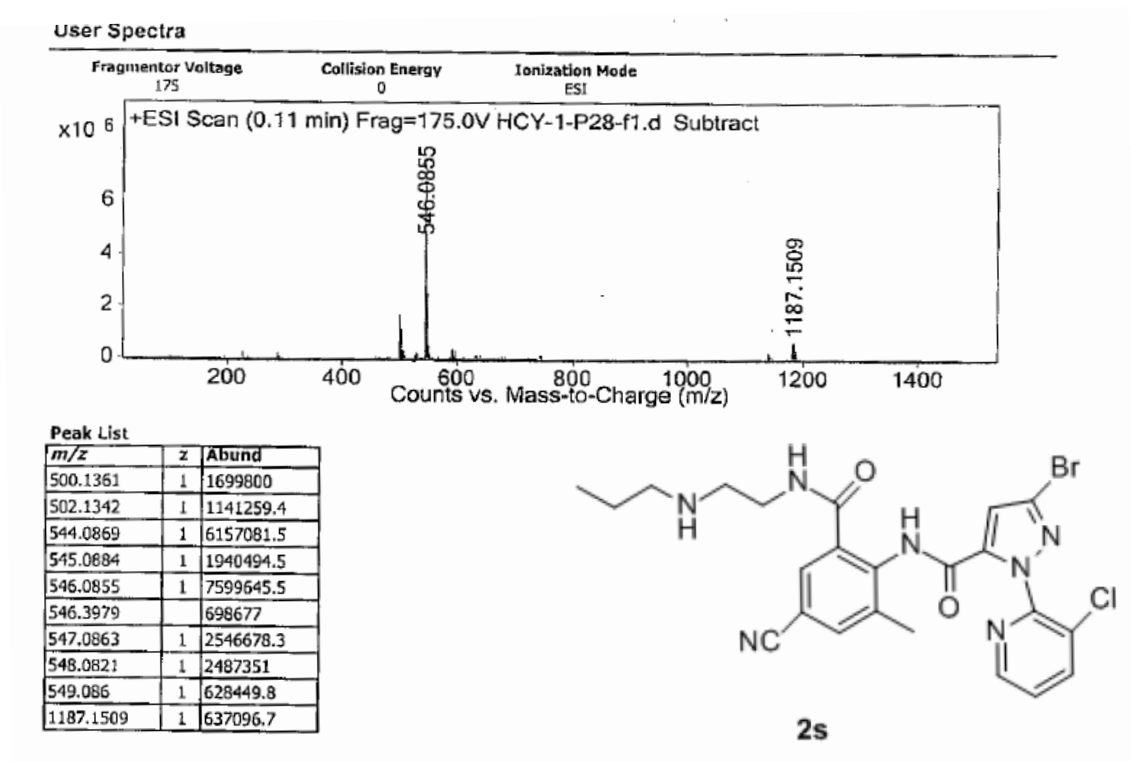

Figure S69. HR-MS spectrum of compound 2s.

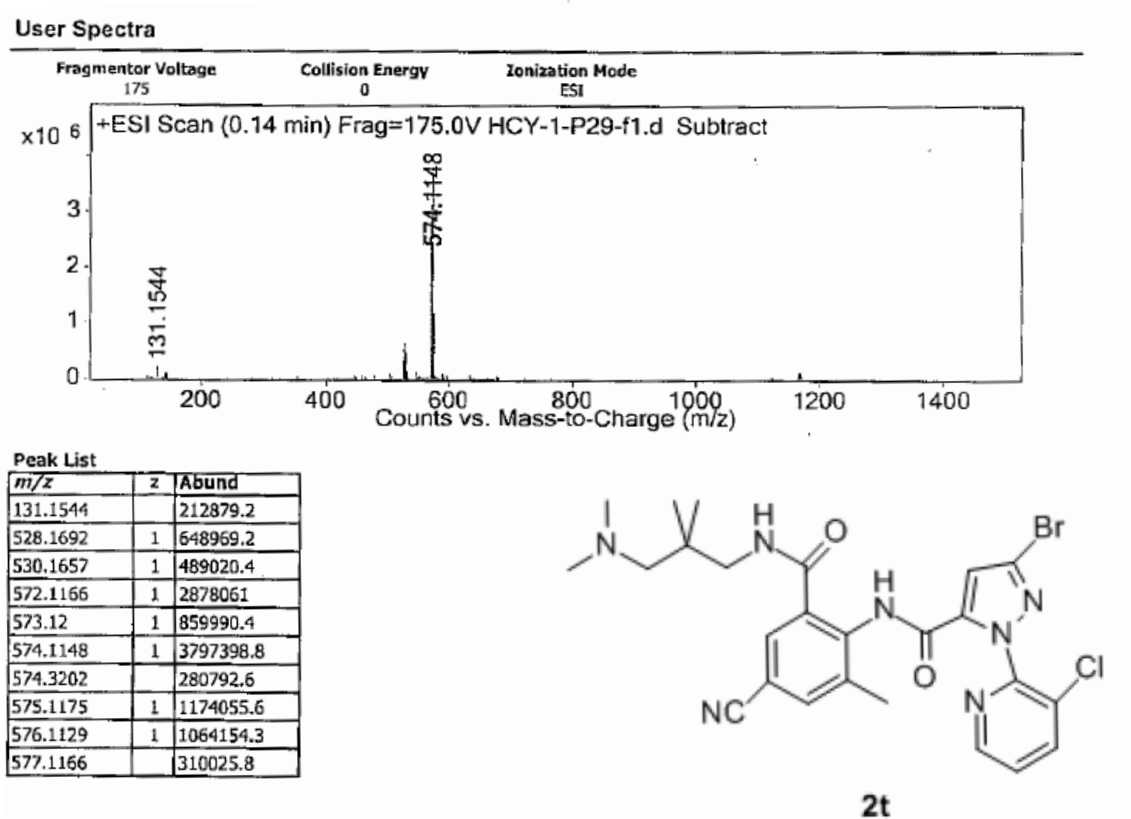

Figure S70. HR-MS spectrum of compound 2t.

## User Spectra

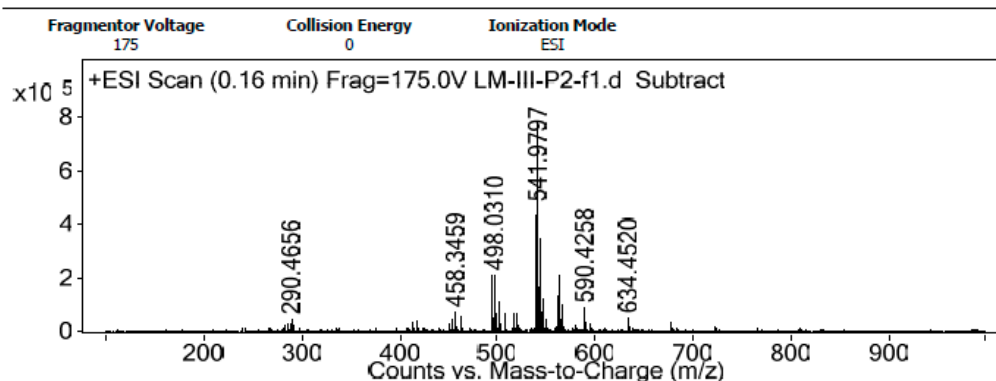

## Peak List

| m/z      | z | Abund    |
|----------|---|----------|
| 496.0333 | 1 | 207511.7 |
| 498.031  | 1 | 208656.1 |
| 502.3725 | 1 | 109257.6 |
| 539.9837 | 1 | 433868.7 |
| 541.9797 | 1 | 782432.2 |
| 542.9837 | 1 | 165118.3 |
| 543.9792 | 1 | 342599.4 |
| 546.3989 | 1 | 121343.5 |
| 561.9643 | 1 | 132692.8 |
| 563.9633 | 1 | 211319.5 |

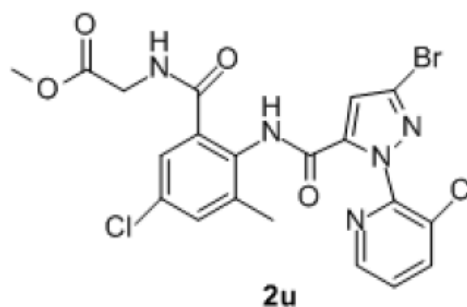Figure S71. HR-MS spectrum of compound **2u**.

## User Spectra

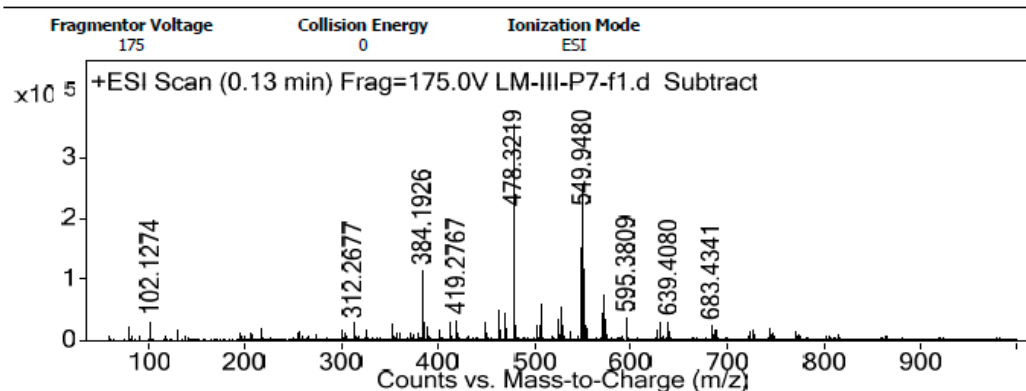

## Peak List

| m/z      | z | Abund    |
|----------|---|----------|
| 384.1926 | 1 | 113644.4 |
| 478.3219 | 1 | 353356.2 |
| 479.3249 | 1 | 124734.4 |
| 507.3297 |   | 57486.6  |
| 527.9668 |   | 52194.4  |
| 547.9505 | 1 | 150210.7 |
| 549.948  | 1 | 256024.5 |
| 550.9512 | 1 | 54022.7  |
| 551.9459 | 1 | 117012   |
| 571.9301 | 1 | 75525.9  |

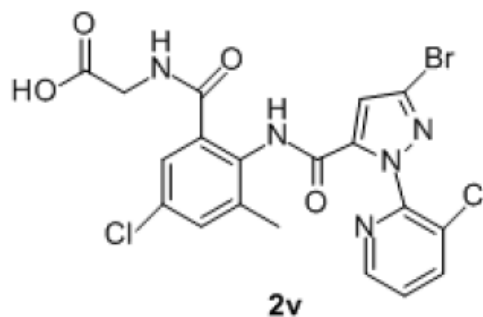Figure S72. HR-MS spectrum of compound **2v**.

## User Spectra

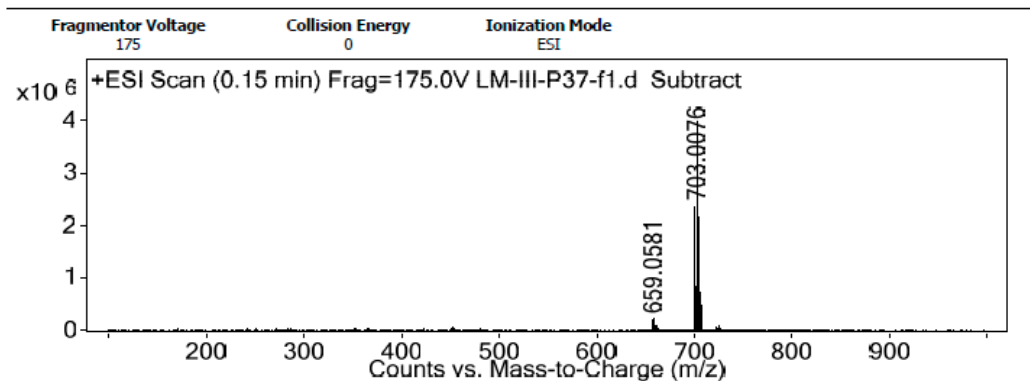

## Peak List

| m/z      | z | Abund     |
|----------|---|-----------|
| 659.0581 |   | 211451.5  |
| 701.0092 | 1 | 2351131.5 |
| 702.0128 | 1 | 838430.5  |
| 703.0076 | 1 | 3974236   |
| 703.2376 |   | 305006.4  |
| 704.0095 | 1 | 1447541.1 |
| 705.0049 | 1 | 2159214.5 |
| 706.0087 | 1 | 707274.3  |
| 707.005  | 1 | 472477.3  |

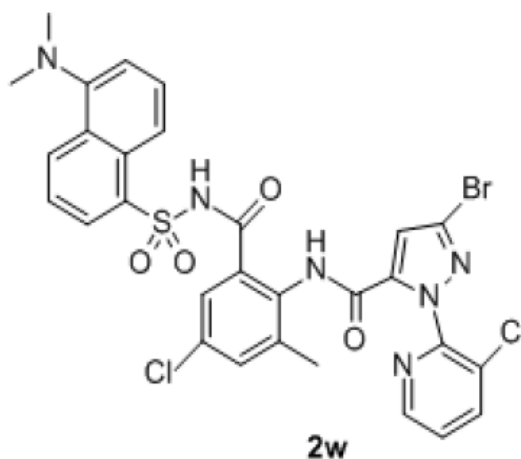Figure S73. HR-MS spectrum of compound **2w**.

## User Spectra

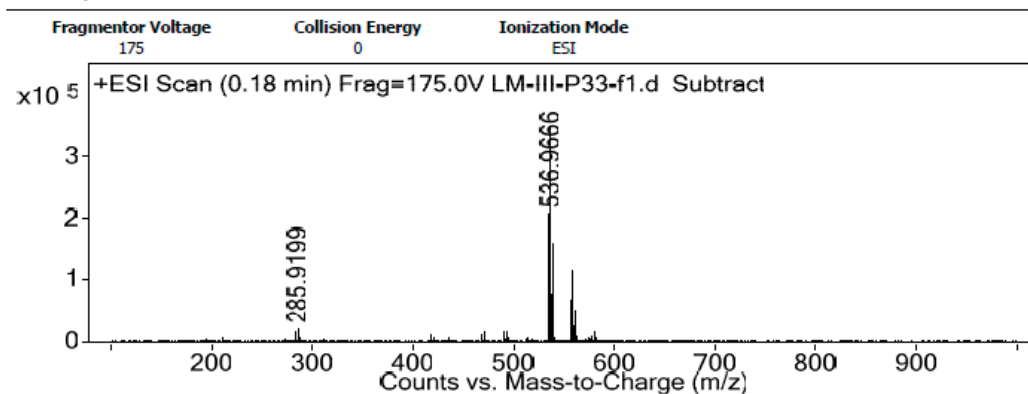

## Peak List

| m/z      | z | Abund    |
|----------|---|----------|
| 534.9688 | 1 | 205748.3 |
| 535.9707 | 1 | 44536.5  |
| 536.9666 | 1 | 347538.7 |
| 537.9685 | 1 | 76448.3  |
| 538.9644 | 1 | 157774   |
| 539.9654 | 1 | 34401.2  |
| 556.95   |   | 66123.5  |
| 558.948  | 1 | 114424.5 |
| 559.9497 | 1 | 24350.9  |
| 560.9457 | 1 | 47238.7  |

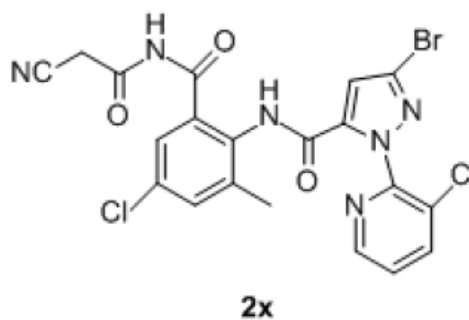Figure S74. HR-MS spectrum of compound **2x**.

## User Spectra

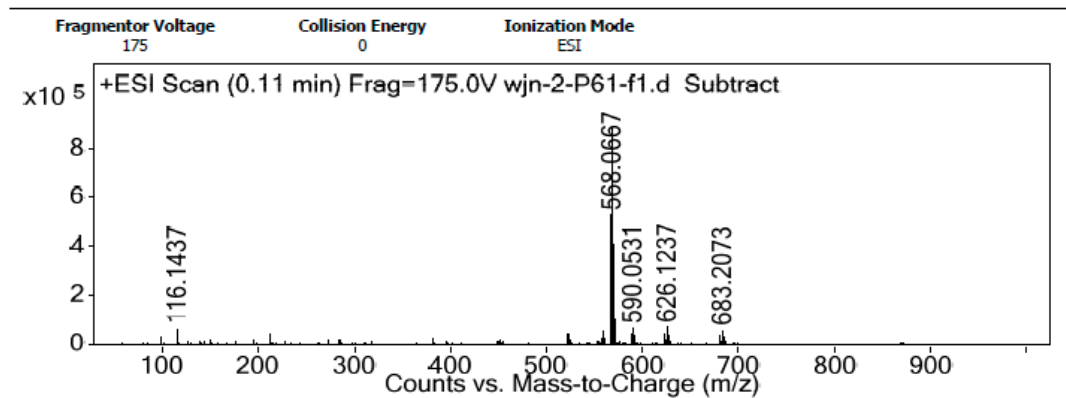

## Peak List

| m/z      | z | Abund    |
|----------|---|----------|
| 116.1437 | 1 | 60162.7  |
| 566.074  | 1 | 528298.6 |
| 567.0763 | 1 | 136970   |
| 568.0667 | 1 | 883447.9 |
| 569.0744 | 1 | 235335.3 |
| 570.07   | 1 | 403314.6 |
| 571.0719 | 1 | 103076.4 |
| 572.0684 | 1 | 58898    |
| 590.0531 | 1 | 63897.5  |
| 626.1237 | 1 | 69808.2  |

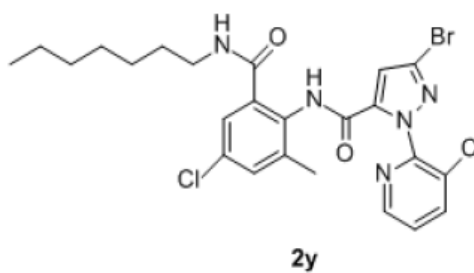

Figure S75. HR-MS spectrum of compound **2y**.
